# Supplementary material for: Improved modeling of human AD with an automated culturing platform for iPSC neurons, astrocytes and microglia
Source: PubMed Central journal article supplement (PMC8410795; doi:10.1038/s41467-021-25344-6), 2021-09-01
Supplement: 41467_2021_25344_MOESM1_ESM.pdf [file 41467_2021_25344_MOESM1_ESM.pdf]

# Supplementary Fig. 1

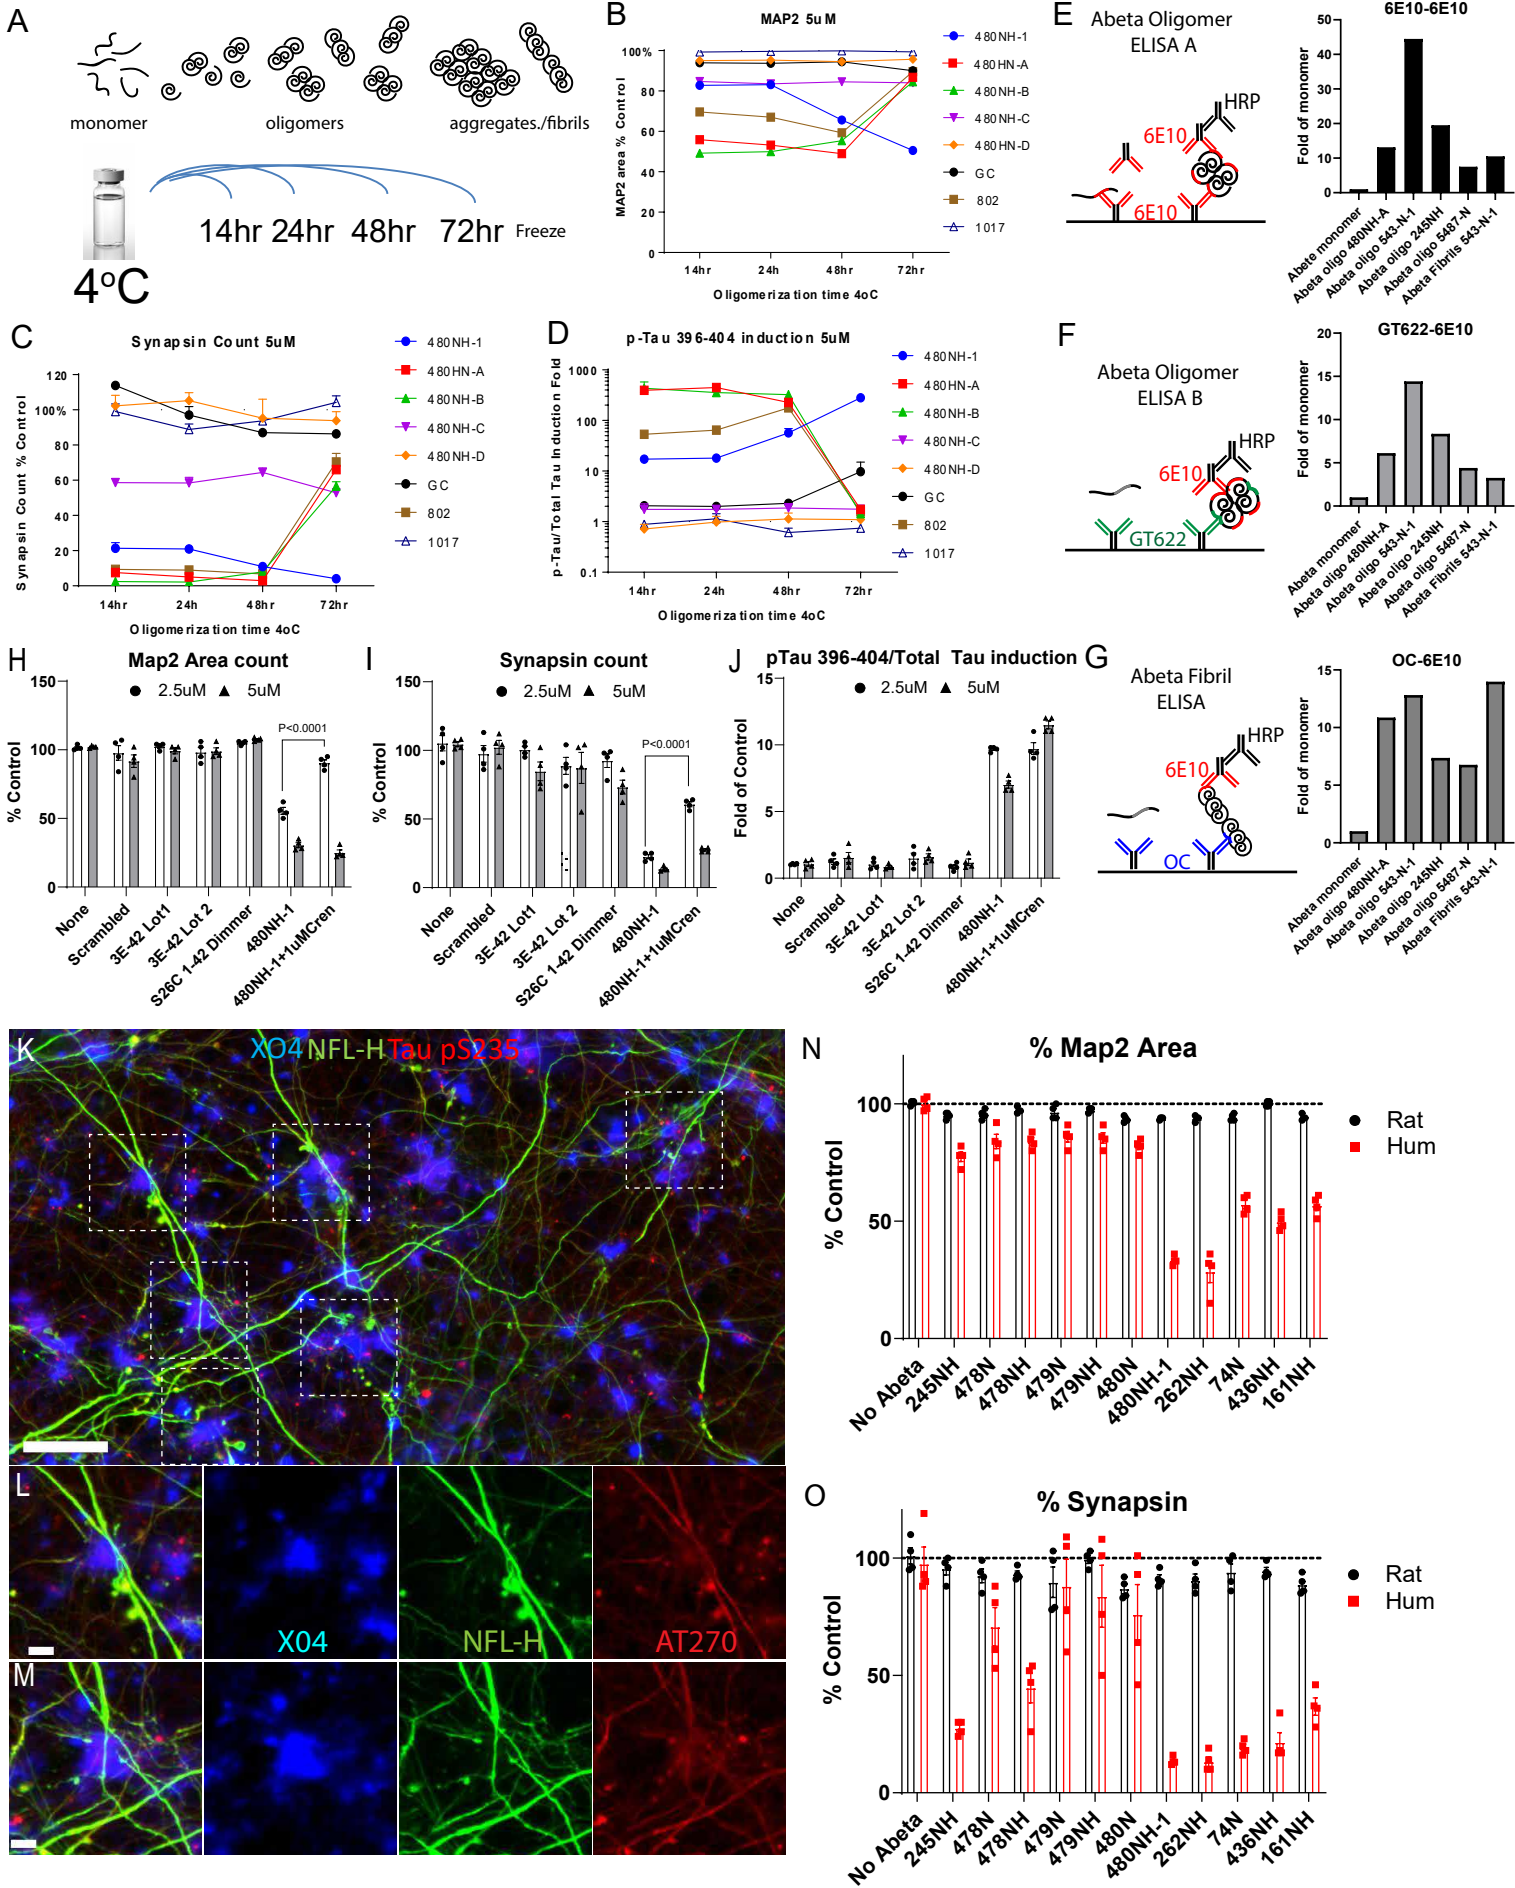

**Supplementary Fig. 1 | sA $\beta$ 42s are selectively toxic to human neurons. (A)** sA $\beta$ 42s were generated by resuspending lyophilized A $\beta$ 42 monomers in PBS and incubating monomers at 4C for 14, 24, 48, 72 hours then frozen. **(B-D)** Several lots of A $\beta$ 42 monomers oligomerized for 14, 24, 48, and 72 hours were assessed for dendrite toxicity (MAP2) **(B)**, synapse loss (Synapsin 1/2) **(C)**, and p-Tau induction (S396/S404) **(D)**. **(E-G)** Several lots of sA $\beta$ 42s oligomerized for 24 hours were characterized for oligomeric and fibril conformation using A $\beta$  oligomer selective and A $\beta$  fibril selective ELISA assays. 6E10-6E10 assay utilizing the same anti-A $\beta$ 42 (6E10) for capture and detection to selectively bind to oligomeric A $\beta$ 42 species **(E)**, GT622-6E10 oligomer assay uses A $\beta$  oligomer specificity antibody clone GT622 as capture and pan A $\beta$  antibody clone (6E10) as detection **(F)**, OC-6E10 assay uses A $\beta$  fibril selective antibody clone OC as capture and pan A $\beta$  antibody clone (6E10) as detection. All values were normalized to A $\beta$  monomer negative control, and A $\beta$ 42 fibrils were generated by oligomerization in 37°C as a positive control to demonstrate the specificity of this assay. **(H-J)** Several lots of A $\beta$ 42 monomers and scramble control were tested at 0, 2.5, 5  $\mu$ M for dose-response toxicity in dendrites (MAP2) **(H)**, synapse loss (Synapsin 1/2) **(I)**, and p-Tau induction (S396/S404) **(J)**. **(K)** Rat cortical neurons treated with 5 $\mu$ M sA $\beta$ 42s for 7 days form many plaque-like, Methoxy-X04 positive structures (blue). A few of these plaque-like structures are surrounded by dystrophic neurite-like blebbings of NFL-H (green), and phospho-Tau (AT270, red). Neuritic plaques are indicated by dotted white boxes. **(L-M)** Zoomed in images of B showing axonal swelling (NFL-H; green) and p-Tau induction (S235; red) in axons around A $\beta$ -plaque structures (Methoxy-X04; blue). Concurrently, **(N-O)** rat neurons fail to show A $\beta$ 42 oligomer toxicity in response to many lots of A $\beta$ 42 oligomer preparations in comparison to human neurons in terms of the dendrite (MAP2) loss **(N)** and severe synapse loss (Synapsin 1/2) **(O)**. Data are presented as mean values +/- SEM and  $n=4$  wells. **(B-D, H-J, N-O)**. Scale bars = 100 $\mu$ m **(K)**, 20 $\mu$ m **(L, M)**.

Supplementary Fig. 2

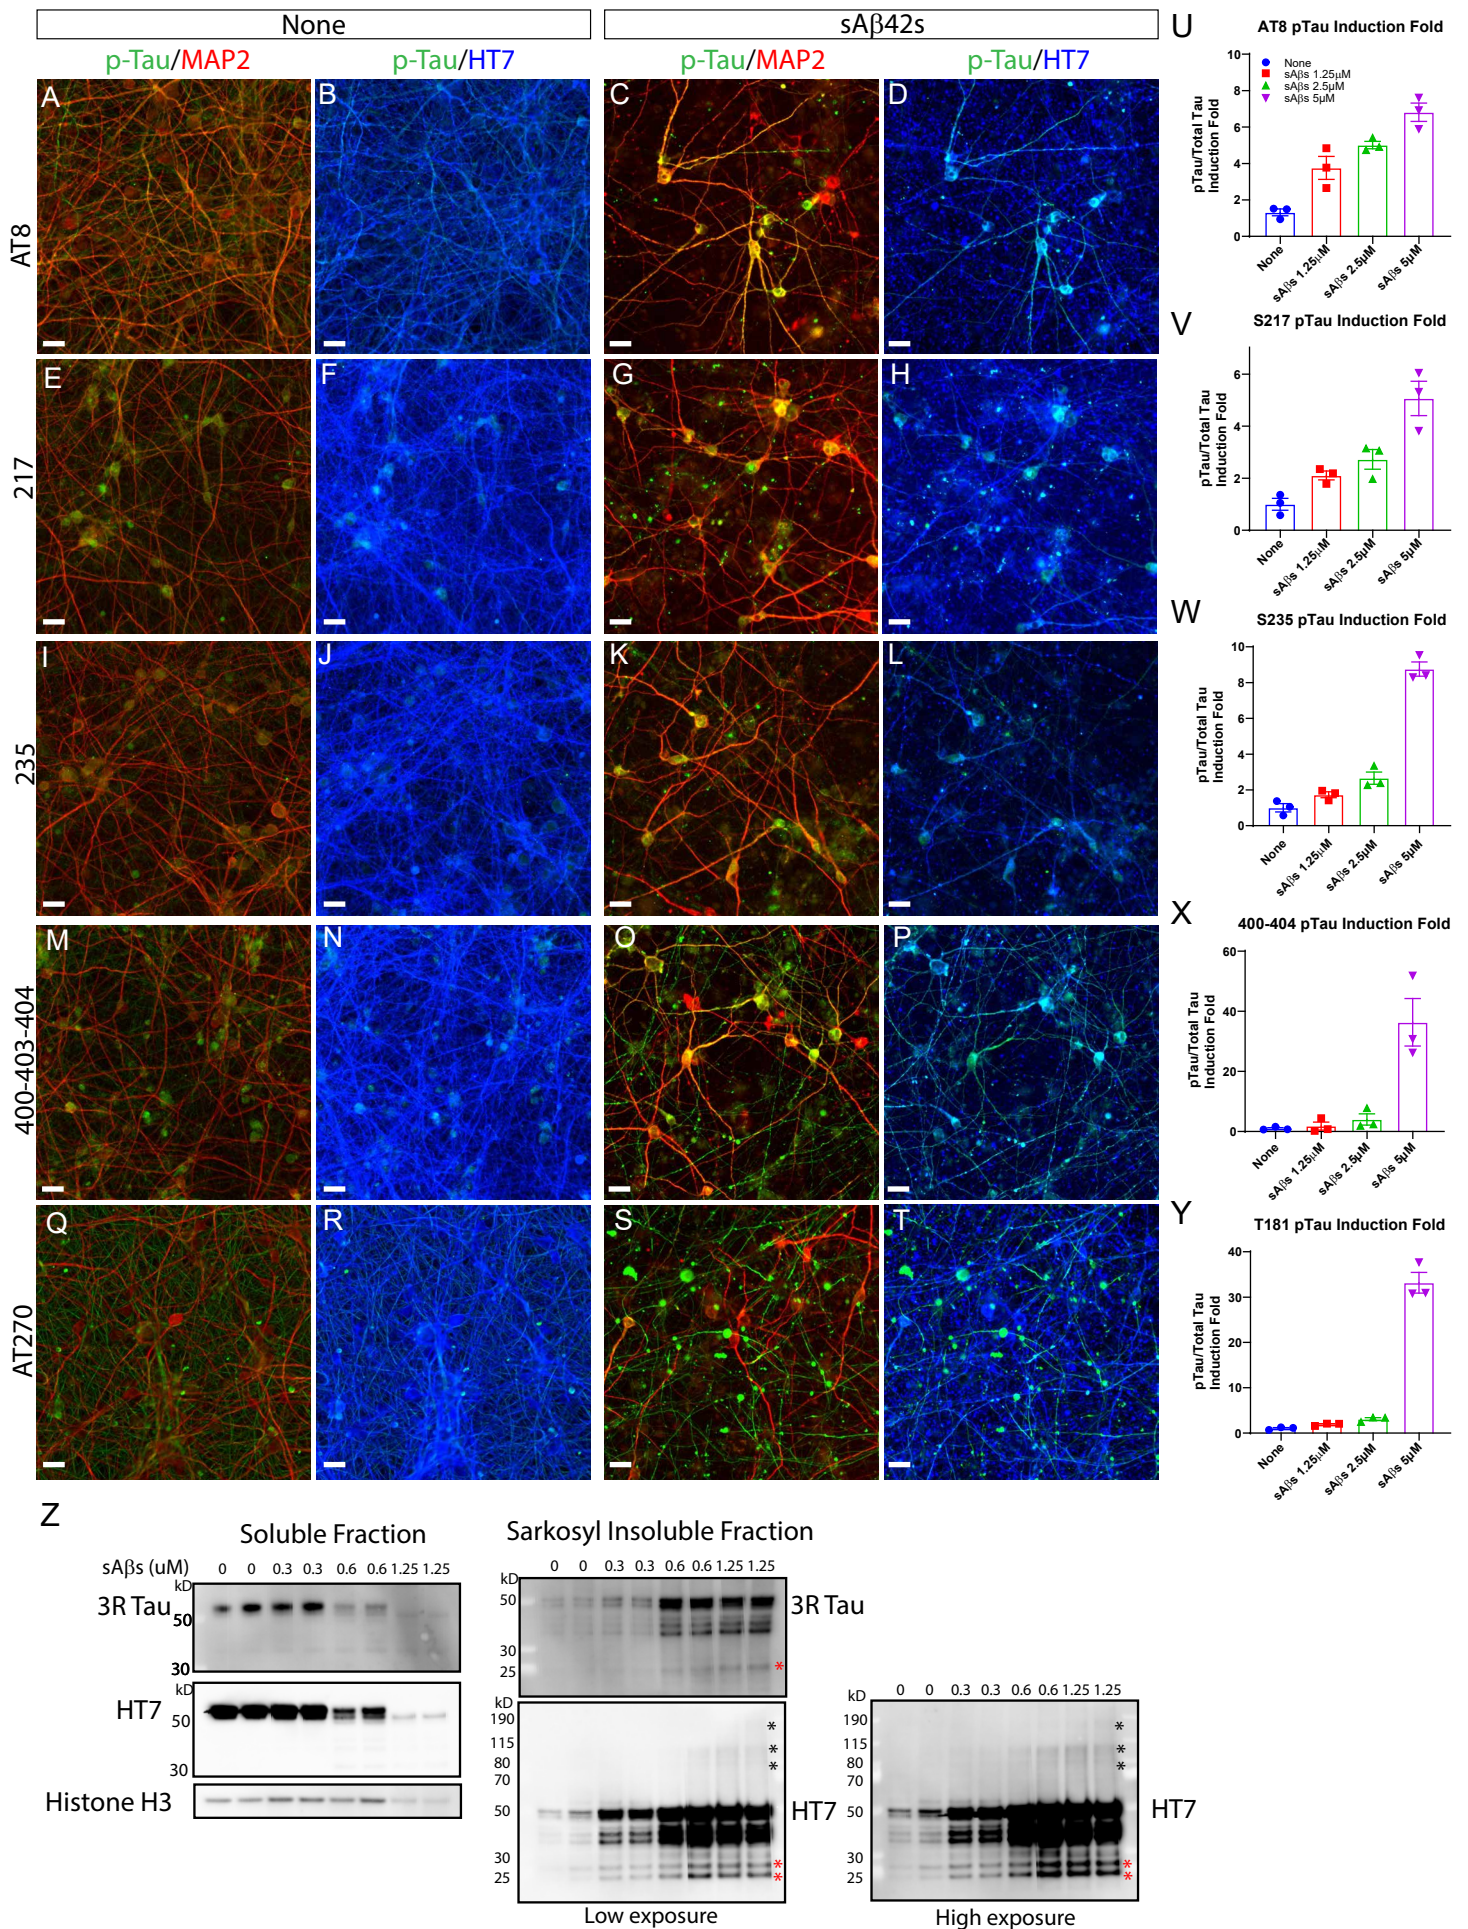

**Supplementary Fig. 2 | Additional characterization of Tau pathologies. (A-D)** sA $\beta$ 42s treatment at 5  $\mu$ M induces somatodendritic accumulation of Tau (overlap with MAP2, third panel) and phosphorylation at S202/T205 and as detected by AT8 antibody (green). **(E-H)** Staining of Tau phosphorylation site S217, **(I-L)** S235, **(M-P)** S400/T403/S404, and **(Q-T)** T181 (AT270) **(U-Y)** Quantification of induction of phosphorylated Tau increases in dose-response to sA $\beta$ 42s treatment concentration; induction fold calculated by the ratio of p-Tau area to total Tau (HT7) area in A $\beta$ <sub>treated</sub> induction over the ratio of p-Tau area to total Tau (HT7) in the untreated control. Data are presented as mean values +/- SEM and *n*=4 wells. Scale bars 50  $\mu$ m. **(Z)** Western blot images showing soluble (right) and insoluble (left) fractions of protein lysates obtained from iPSC neurons and astrocytes treated with 0, 0.3, 0.6, or 1.25 $\mu$ M sA $\beta$ 42s twice weekly for three weeks, then probed for 3R Tau protein, total Tau (HT7) and loading control histone H3. Upon treatment with soluble A $\beta$  species, there is a dose-dependent increase in the insoluble 3R and total Tau and depletion of these proteins from the soluble fraction. In high concentrations of soluble A $\beta$  species, there are lower molecular weight truncated Tau proteins (red asterisks) and larger molecular weight Tau aggregates (black asterisks).

Supplementary Fig. 3

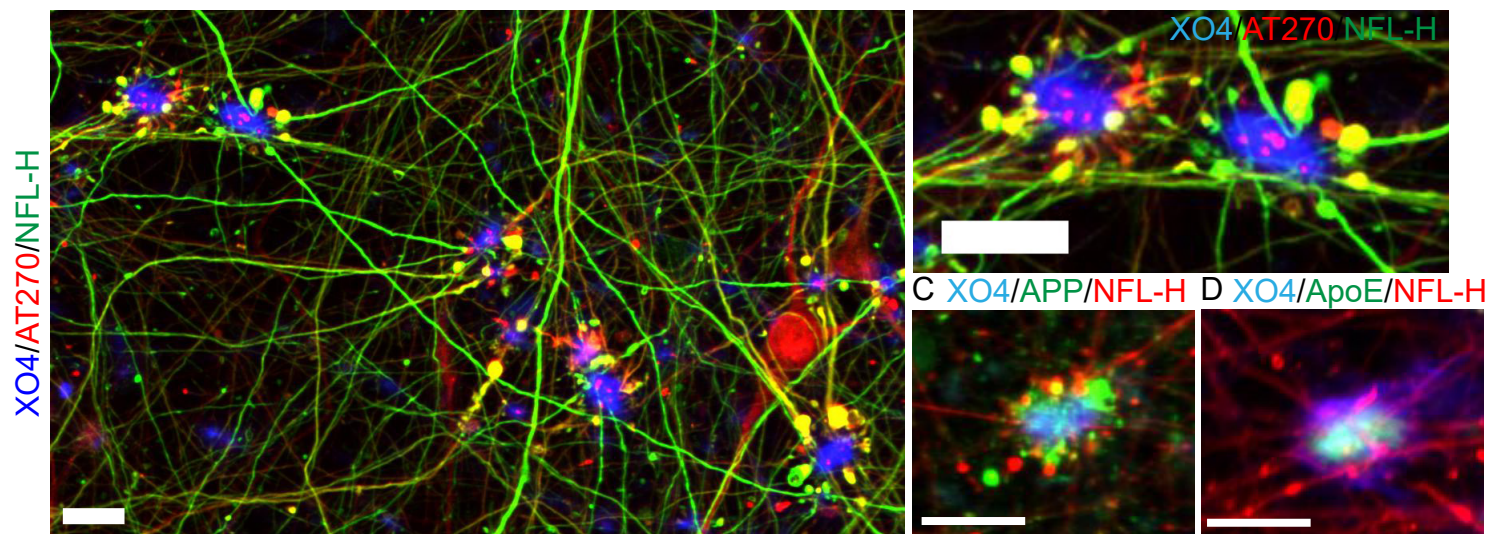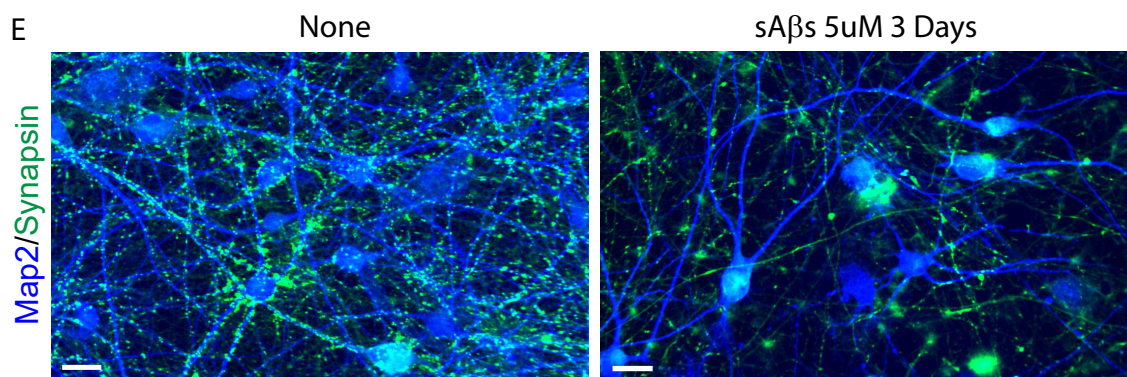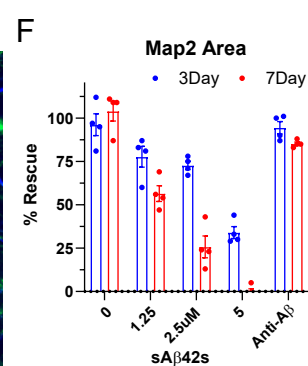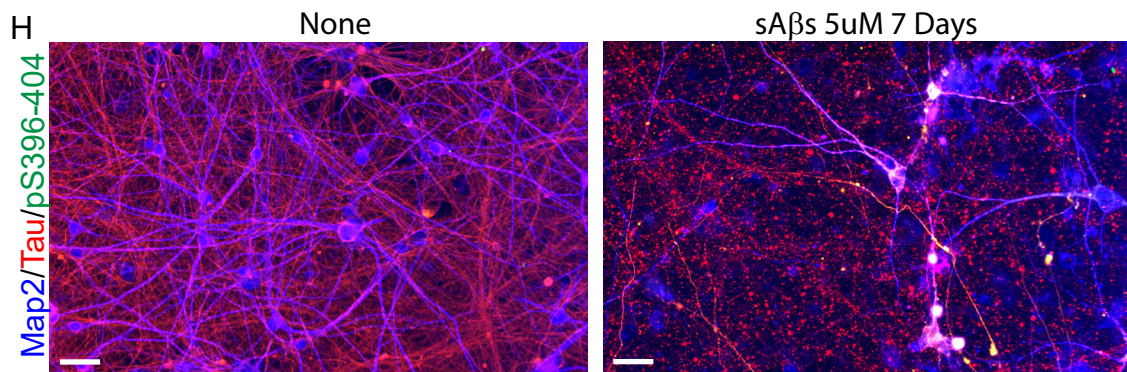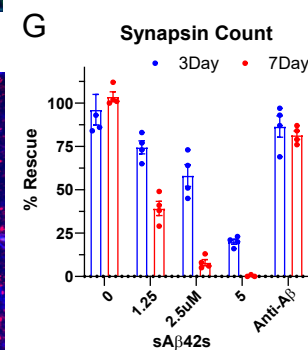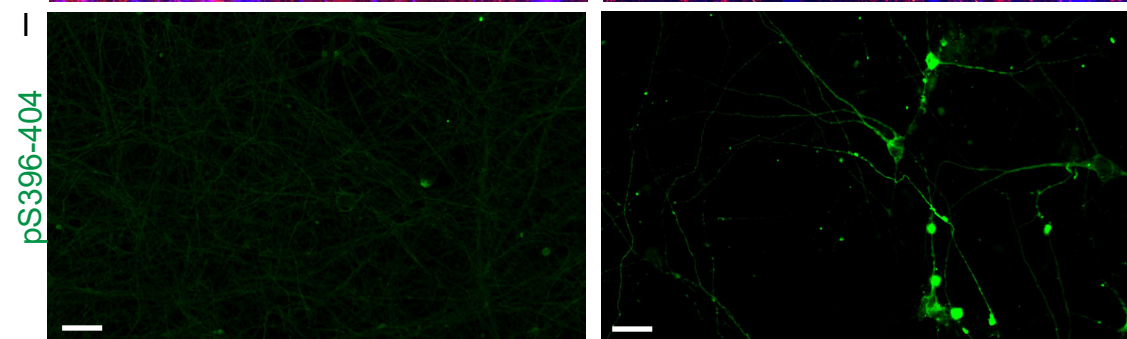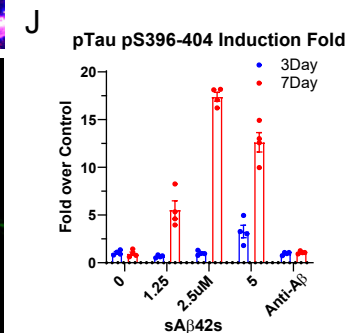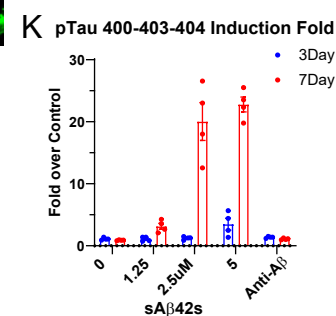

**Supplementary Fig. 3 | NSC-NAG Line 2 has similar sA $\beta$ 42s-induced phenotypes. (A)**

NAG-NSC Line 2 and primary astrocytes treated with 5  $\mu$ M sA $\beta$ 42s for 7 days and stained for A $\beta$ -plaque structures (Methoxy-X04; blue), axons (NFL-H; green), and p-Tau (AT270; red). Right, the zoomed in image showing neuritic plaque. Scale bar = 50um. **(B)** NAG-NSC Line 2

and primary astrocytes treated with 5 $\mu$ M soluble A $\beta$  species for 7 days show loss of dendrites (MAP2, blue) and loss of synapses (synapsin, green) compared to no treatment on right. Scale bar = 50um **(C)** NAG-NSC Line 2 and primary astrocytes treated repeatedly treated with 1.25

$\mu$ M sA $\beta$ 42s 3 times and stained with additional neuritic plaque markers APP (green), X04 (Methoxy-X04; blue), and axons (NFL-H; green). Scale bar = 50um **(D)** Triple culture of NAG-

NSC Line2, astrocytes, and iPSC microglia repeatedly treated with 1.25  $\mu$ M sA $\beta$ 42s for 3 times and stained with additional plaque markers ApoE (D, green), X04 (Methoxy-X04; blue), and axons (NFL-H; green). Scale bar = 50um **(E-G)** Quantification of MAP2 and synapsin

demonstrate dose-dependent and time-dependent loss of dendrites (MAP2) and synapses (synapsin), and both can be rescued with treatment with anti-A $\beta$  antibody. Scale bar = 100 um.

**(H-K)** NAG-NSC Line 2 and primary astrocytes treated with 5uM sA $\beta$ 42s for 7 days show loss of dendrites (MAP2, blue), Tau fragmentation (HT7, red), as well as upregulation and mislocalization of phospho-Tau (pS396-404, green) from axons to cell bodies and dendrites **(I)**.

**(J-K)** Quantification of phospho-Tau p396-404 **(J)** and phospho-Tau p400-403-404 **(K)** fold induction to show that phospho-Tau is upregulated in a dose and time-dependent manner, and this can be blocked with the treatment of anti-A $\beta$  antibody. Data are presented as mean values

+/- SEM and  $n=4$  wells.

Supplementary Fig. 4

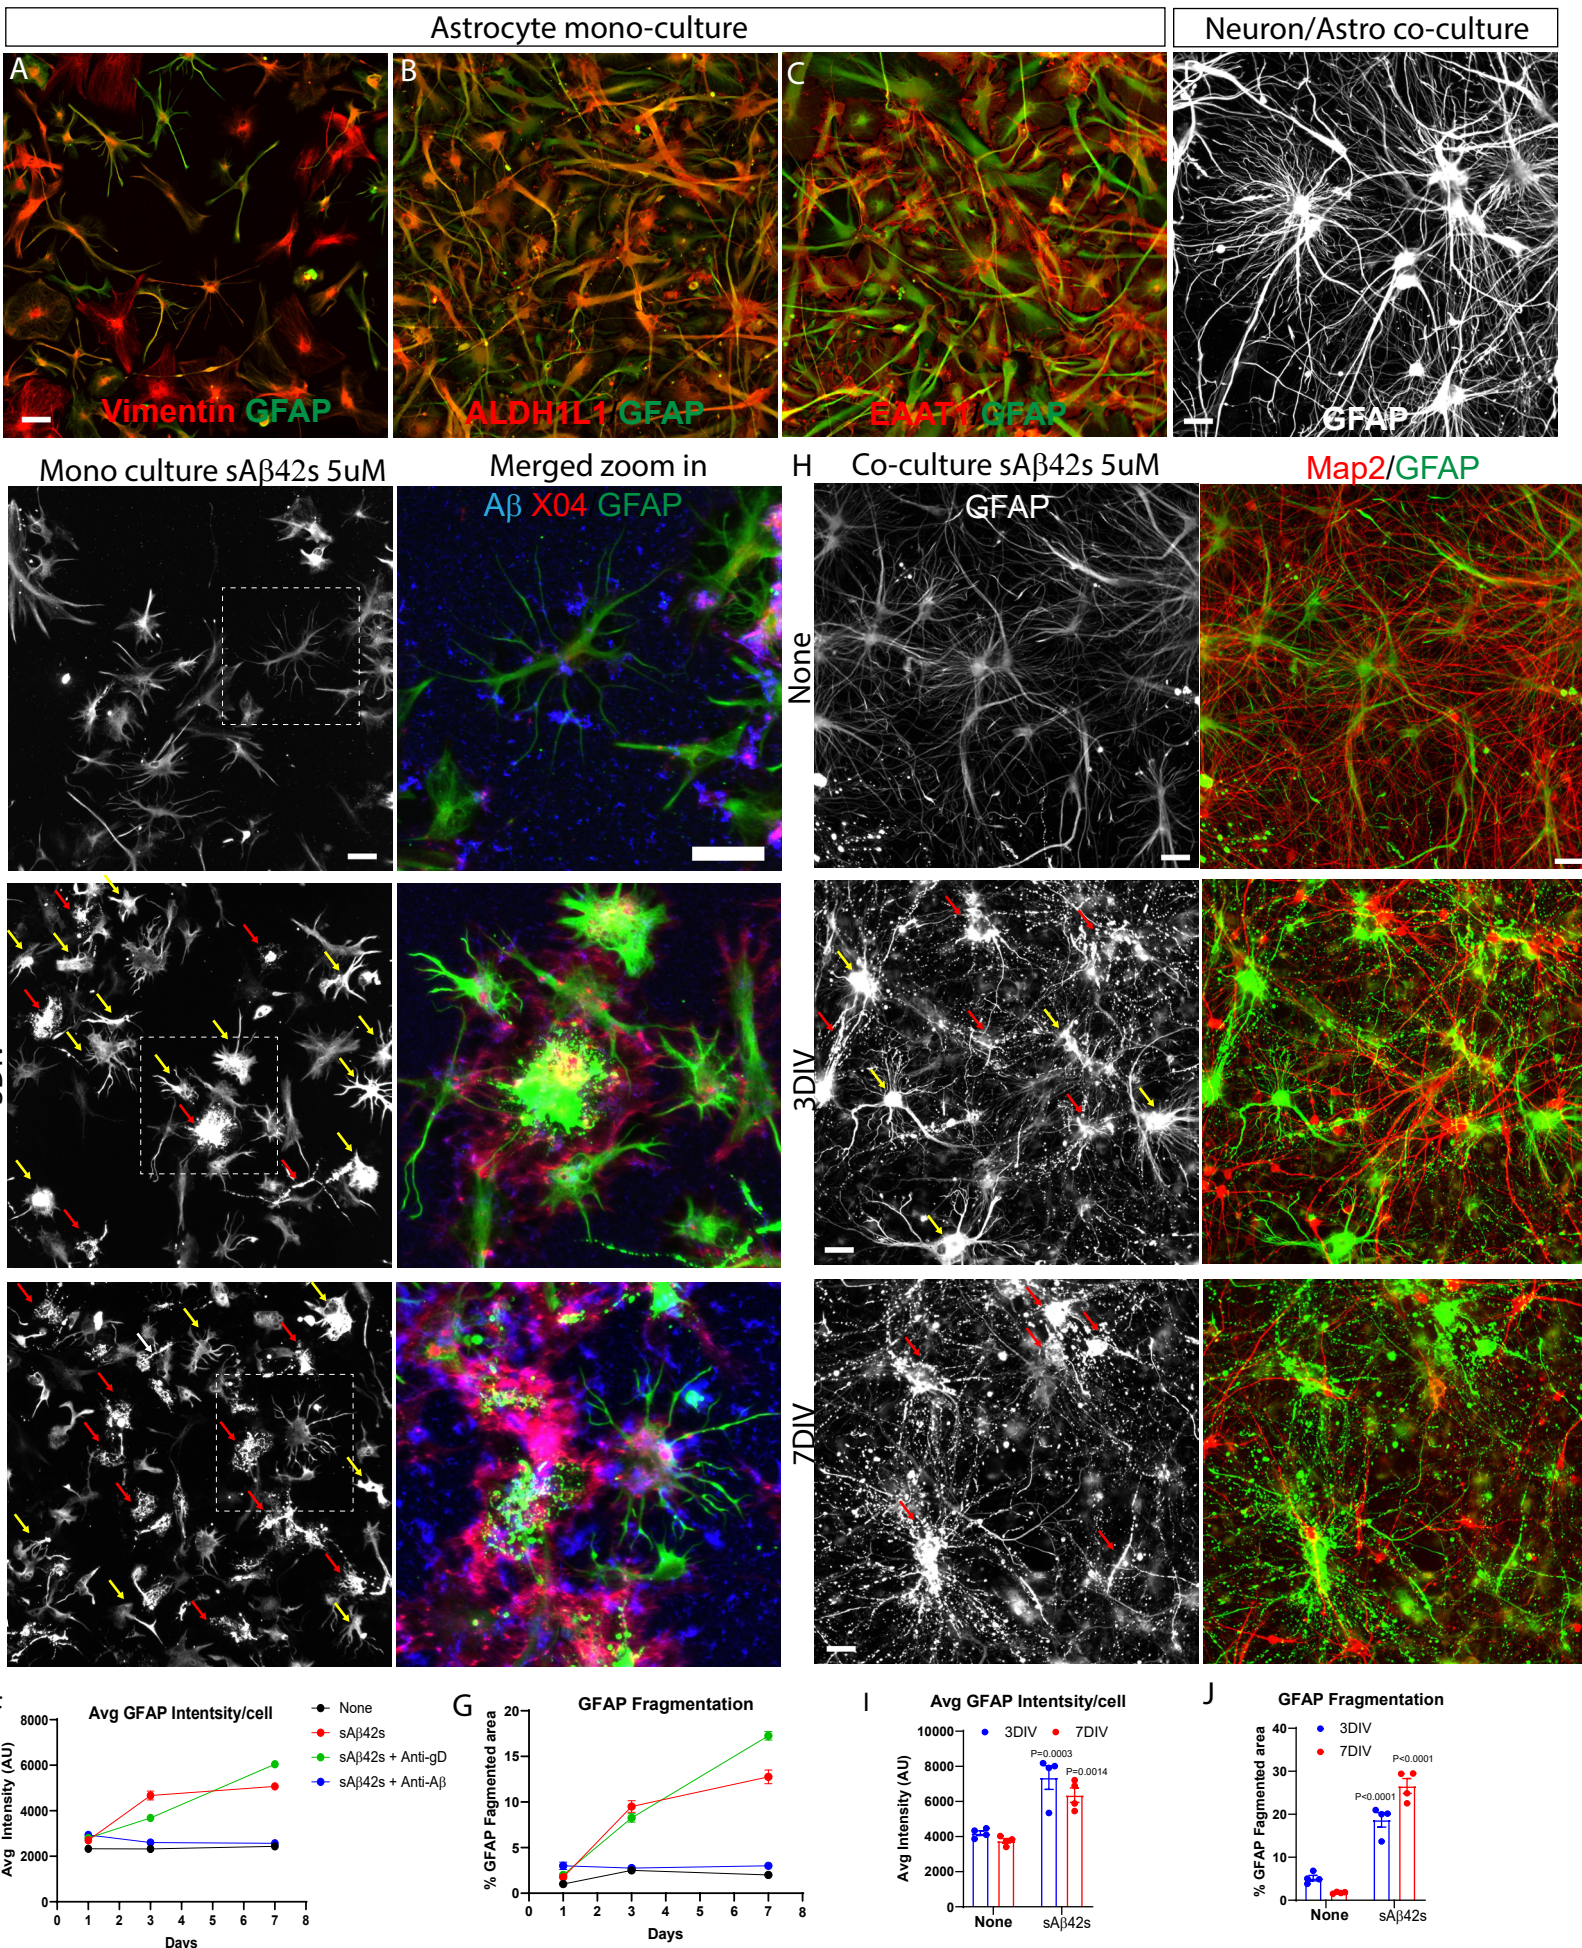

#### **Supplementary Fig. 4 | sA $\beta$ 42s upregulate GFAP expression and induce GFAP**

**fragmentation (A-C)** Primary human astrocytes cultured alone in Neuron Maintenance Medium express astrocyte markers GFAP (green), Vimentin (red, A), ALDH1L1 (red, B), and EAAT1 (red, C). **(D)** Primary human astrocytes cocultured with neurons in Neuron Maintenance Medium develop elaborate processes and more mature morphology (GFAP, white). **(E)** Primary human astrocytes cultured alone in Neuron Maintenance Medium upregulated GFAP (right, white; left, green) starting at 3DIV upon treatment with 5 $\mu$ M sA $\beta$ 42s, aggregate A $\beta$  (6E10, blue), and form diffuse dye-positive structures (Methoxy-X04, red) that are morphologically different from dye-positive structures that microglia form. At 1DIV (top), we observe small aggregates of A $\beta$  around cell processes that grow and begin to result in some cell death, which worsens at 7DIV. Yellow arrows indicate astrocytes with increased GFAP expression. Red arrows indicate dead/dying cells. The white dotted box indicates the zoomed in regions on the right. **(F)** Quantification of average GFAP intensity/cell shows that at 3DIV astrocytes treated with soluble A $\beta$  species upregulate GFAP, and this is blocked by treatment with anti-A $\beta$  antibody. **(G)** Cell death quantified by fragmentation of the cell body using GFAP shows that primary human astrocytes treated with sA $\beta$ 42s show marked cell death at 3DIV which worsens at 7DIV. **(H-J)** Primary human astrocytes cocultured with neurons treated with 5 $\mu$ M sA $\beta$ 42s also demonstrate similar upregulation of GFAP **(I)** and cell fragmentation indicating cell death **(J)** in a dose- and time-dependent manner. Data are presented as mean values +/- SEM and  $n=4$  wells. Two-way ANOVA with Sidak's multiple comparisons test. Scale bar=100 $\mu$ m.



Supplementary Fig. 5

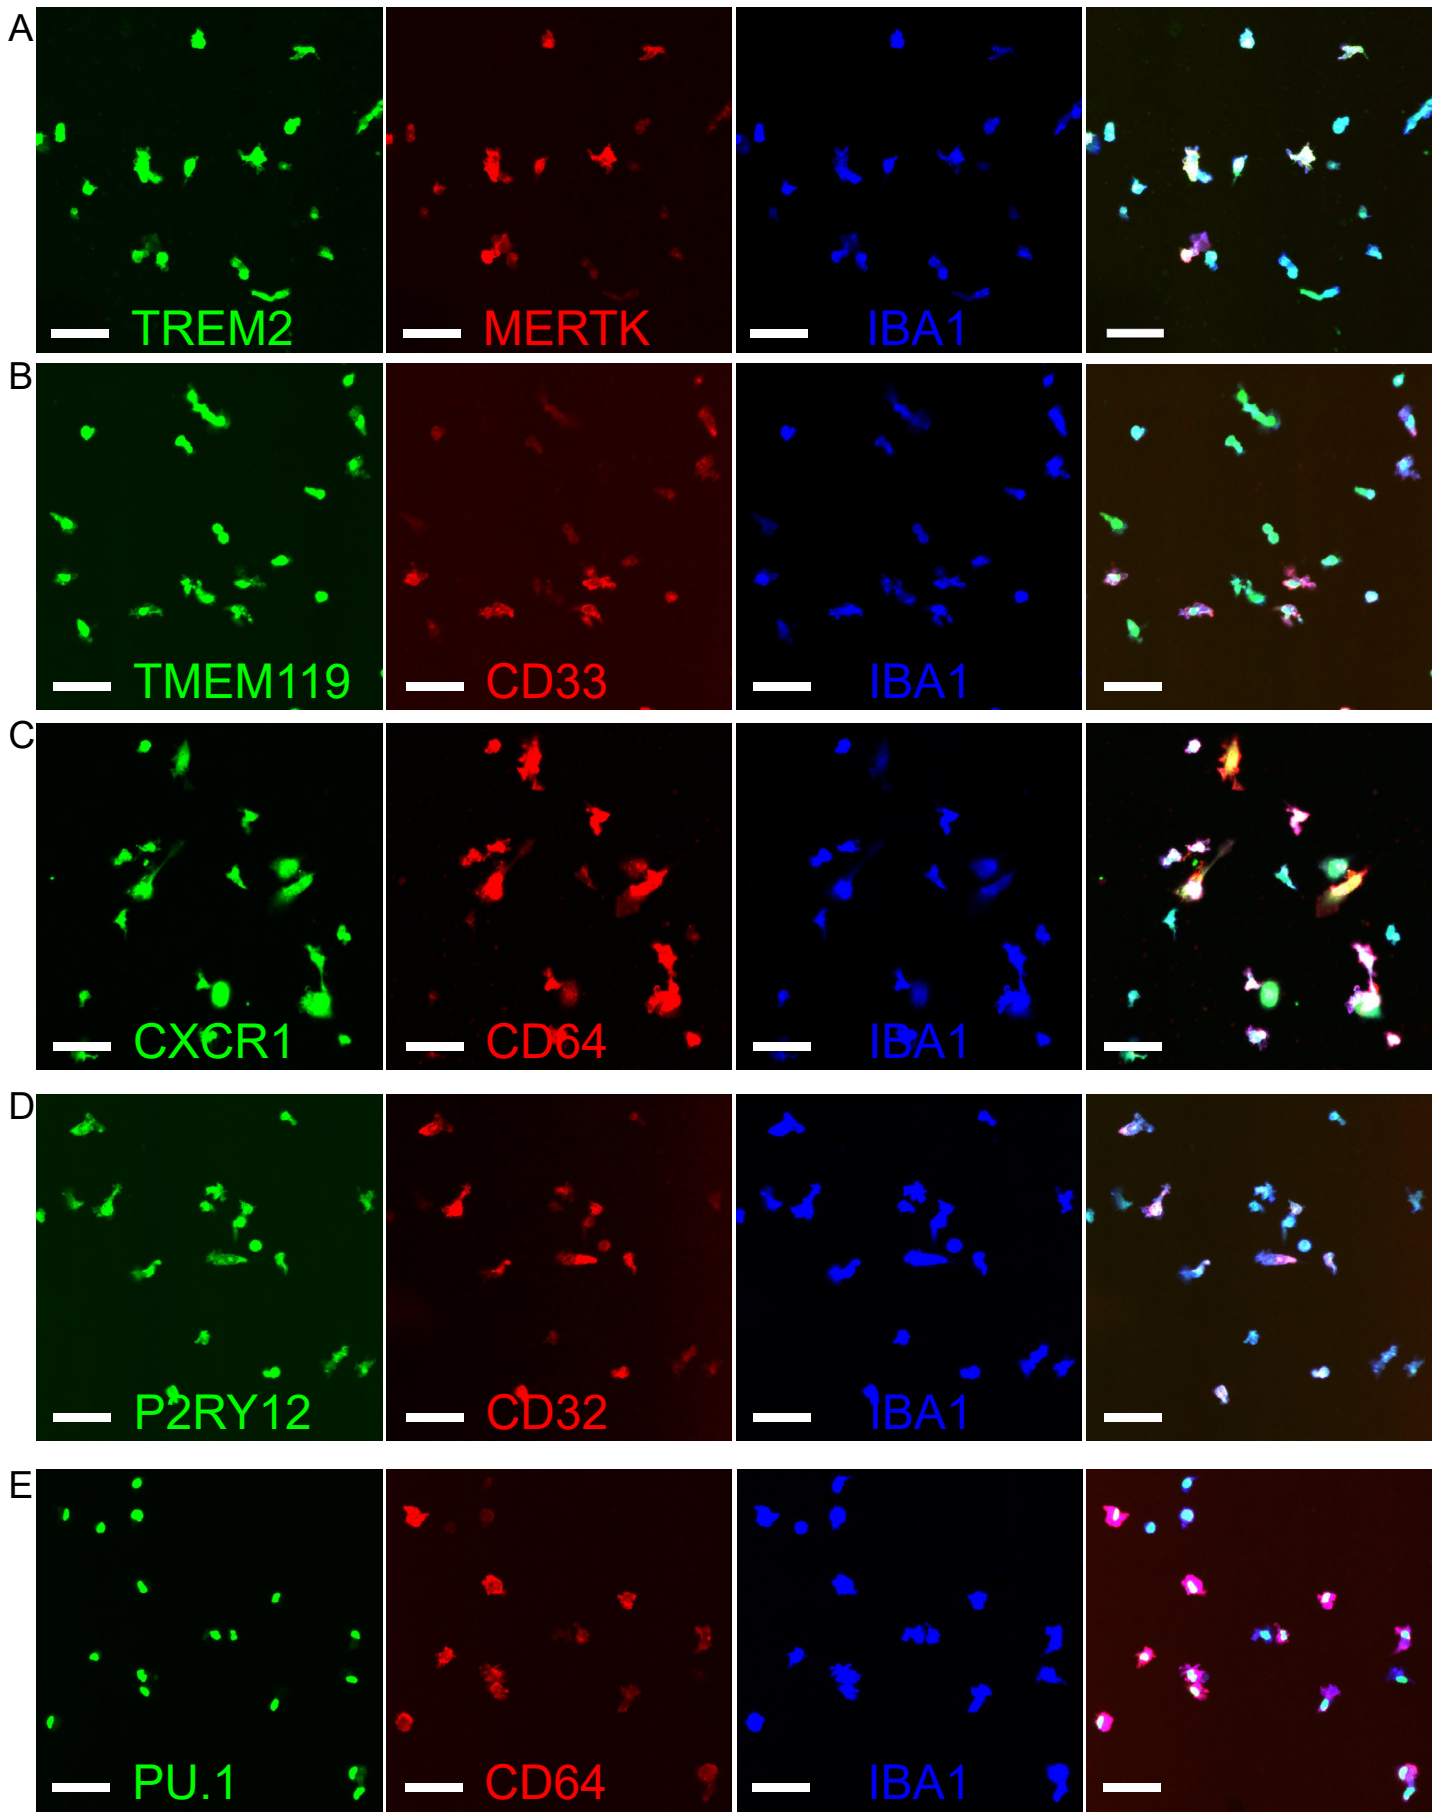

**Supplementary Fig. 5 | Human iPSC microglia express common microglial markers and have typical ramified morphology. (A-E)** iPSC derived microglia were stained with antibodies against microglia markers: TREM2, TMEM119, CXCR1, P2RY12, PU.1 (green); MERTK, CD33, CD64, CD32 (red); IBA1 (blue). Scale bar = 50 $\mu$ m.

Supplementary Fig. 6

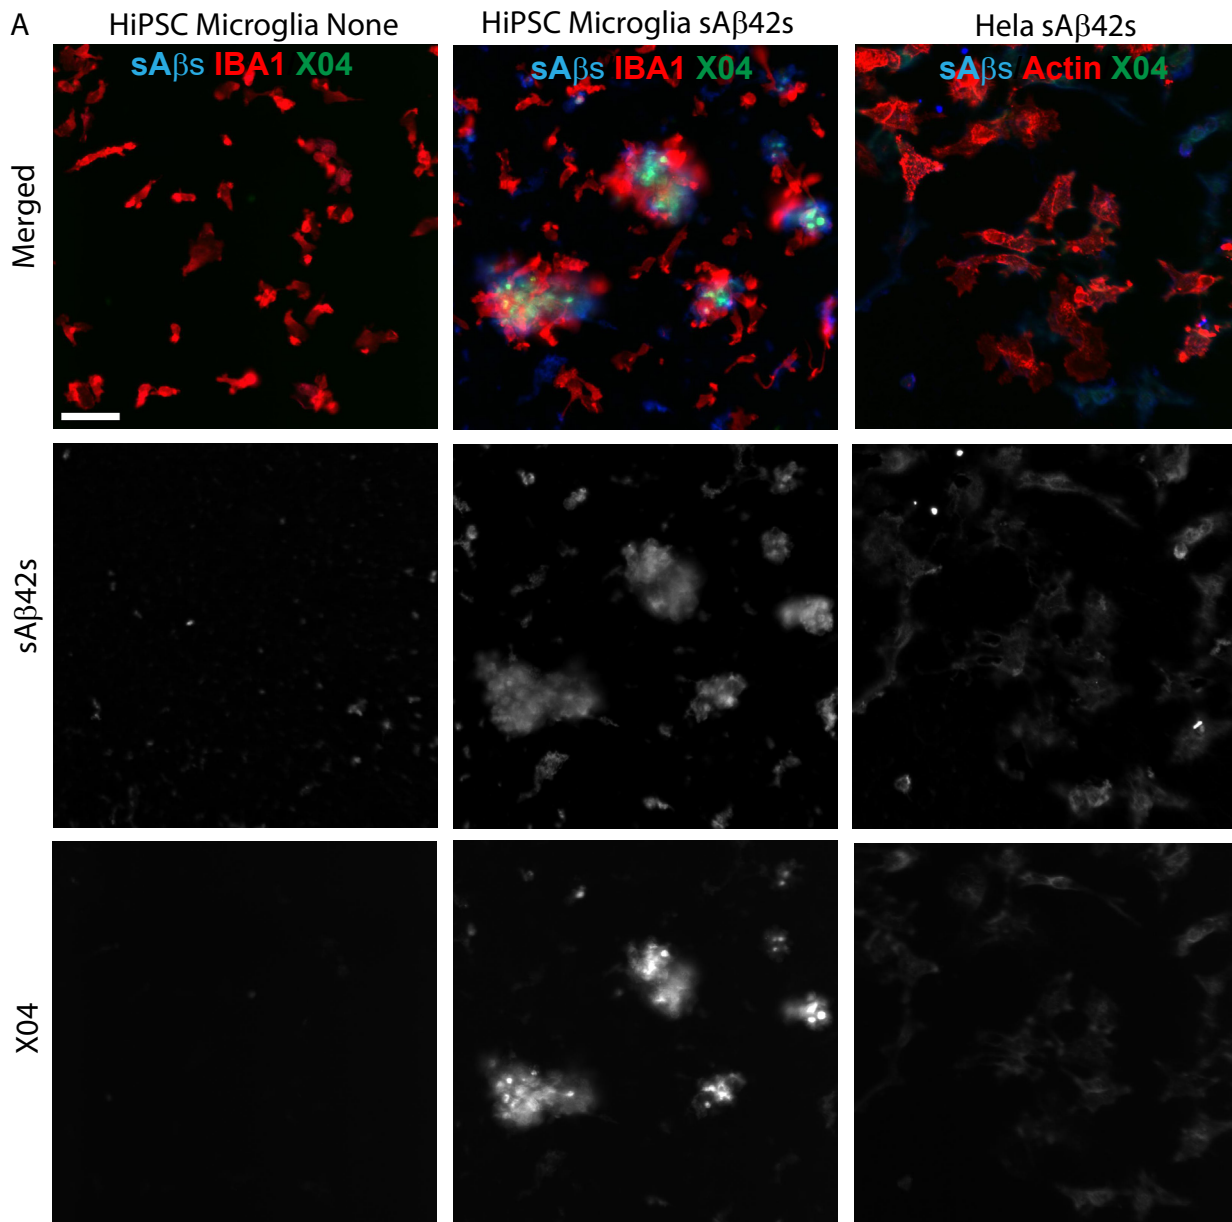

Supplementary Fig. 6 | Amyloid plaque-like structures generated by human iPSC microglia but not by HeLa cells. (A) Left, human iPSC-derived microglia (IBA1, red) receiving no treatment show no accumulation of A $\beta$  (6E10, blue), no plaque-like structures (Methoxy-X04, green). Middle, human iPSC-derived microglia (IBA1, red) treated with 2.5 $\mu$ M sA $\beta$ 42s (6E10, blue) show accumulation of discrete plaque-like structures (Methoxy-X04, green) that are surrounded by cells. Right, HeLa cells (Phalloidin, red) treated with 2.5 $\mu$ M sA $\beta$ 42s (6E10, blue) showed low surface binding of A $\beta$  but did not generate the same characteristic plaque-structures (Methoxy-X04, green) observed in human iPSC derived-microglia. All scale bars = 50 $\mu$ m.

## Supplementary Fig. 7

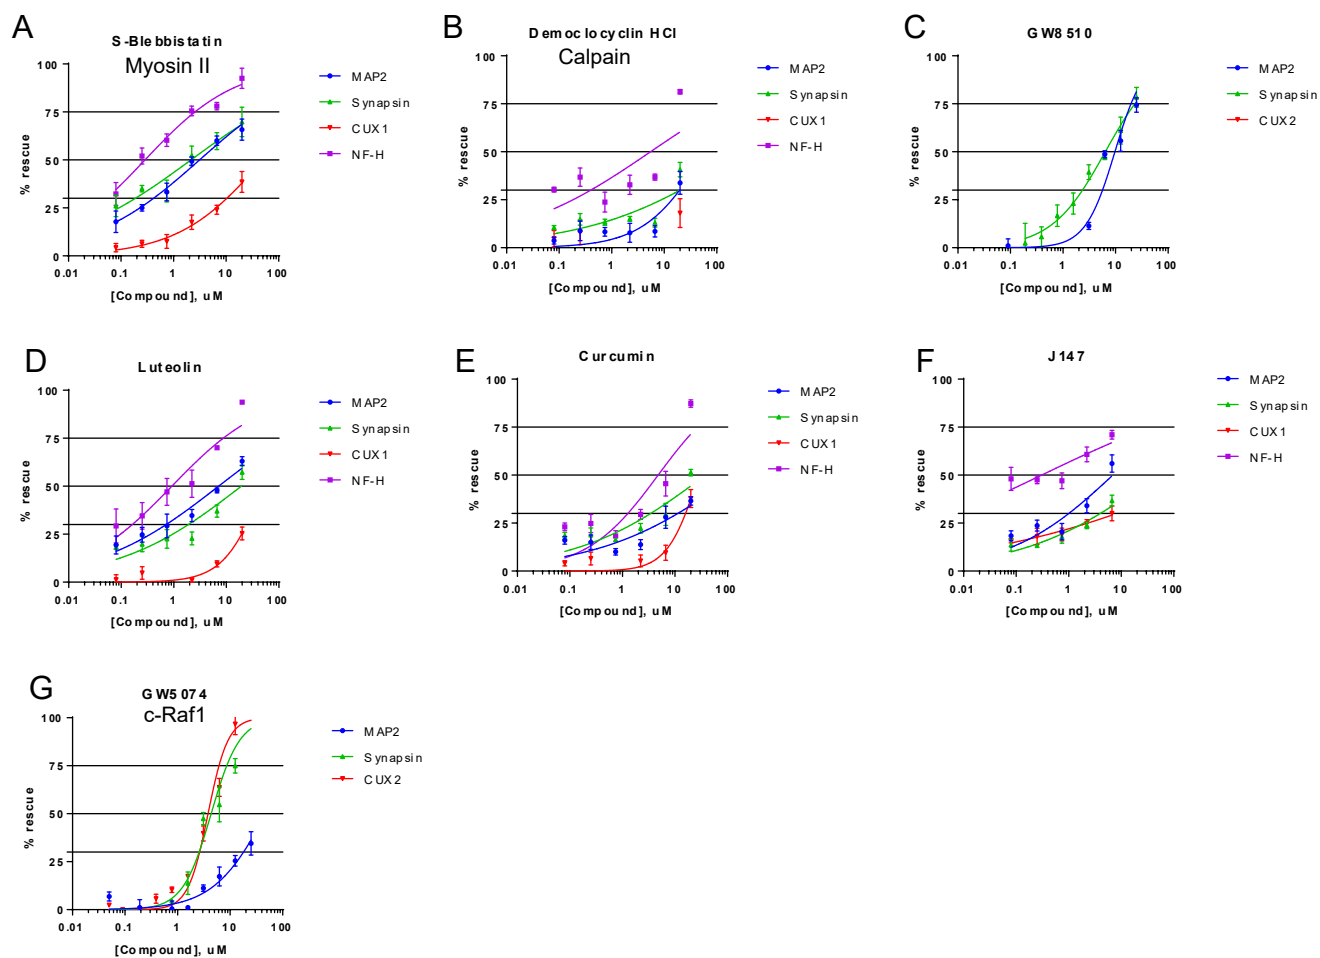

Supplementary Fig. 7 | IC50 validation of focused screen hits. (A-G) Hits from the focused screen (Fig. 5) were tested in dose-response curve for markers MAP2 (blue), Synapsin (green), CUX1/2 (red), NF-H (purple). All error bars represent s.e.m. and n=4 wells. IC50 curves were fitted using Prism software.

## Supplementary Fig. 8

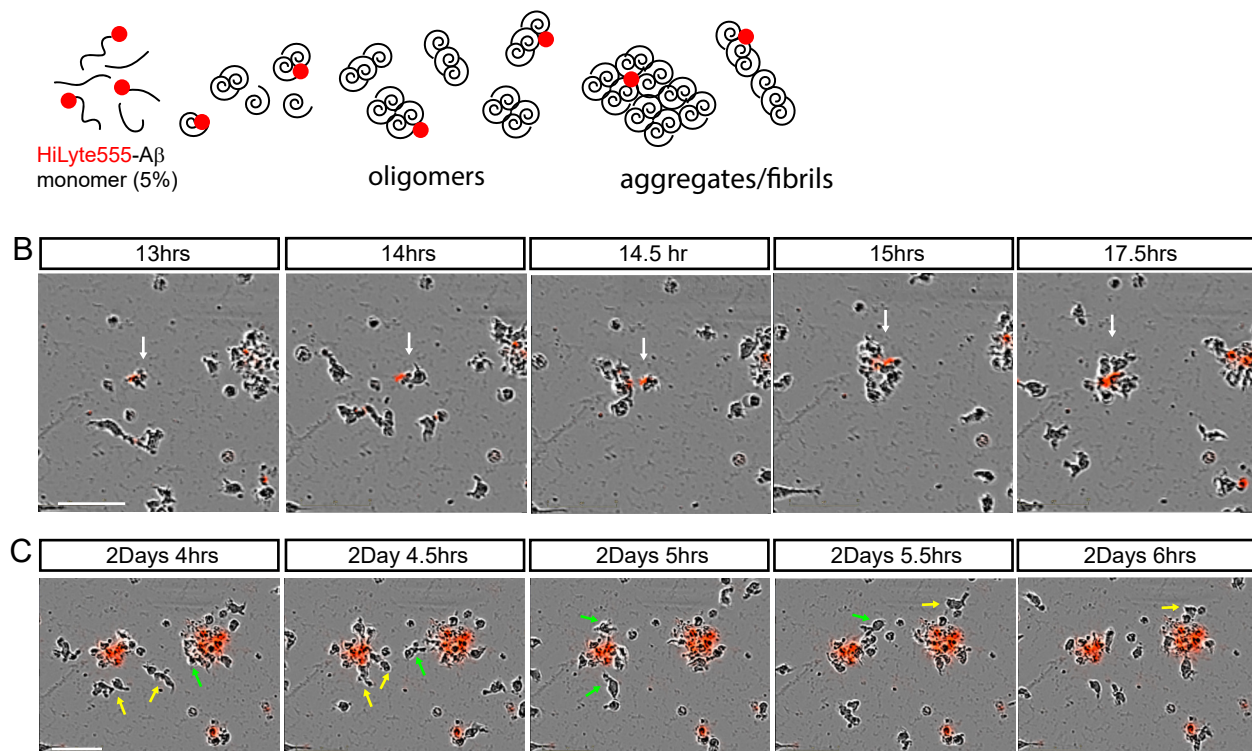

Supplementary Fig. 8 | Human iPSC microglia exhibit dynamic activities during  $A\beta$  plaque formation. (A) Schematic showing  $sA\beta_{42}$ s that were made using 5% HiLyte-555 labeled  $A\beta_{42}$  monomers. (B) Representative images are taken from Incucyte Zoom software over a 7-day time-lapse showing the same field of view to track the microglial formation of one  $A\beta_{42}$  plaque (red) indicated by the white arrow in the indicated time frame. Scale bar = 50  $\mu\text{m}$ . (C) Example of microglia movement around the plaques. After 2 days plaque formation has occurred within this 2-hour window, some microglial cells join plaque indicated by yellow arrows, and some cells that leave plaque indicated by green arrows. Scale bar = 50  $\mu\text{m}$ .

Supplementary Fig. 9

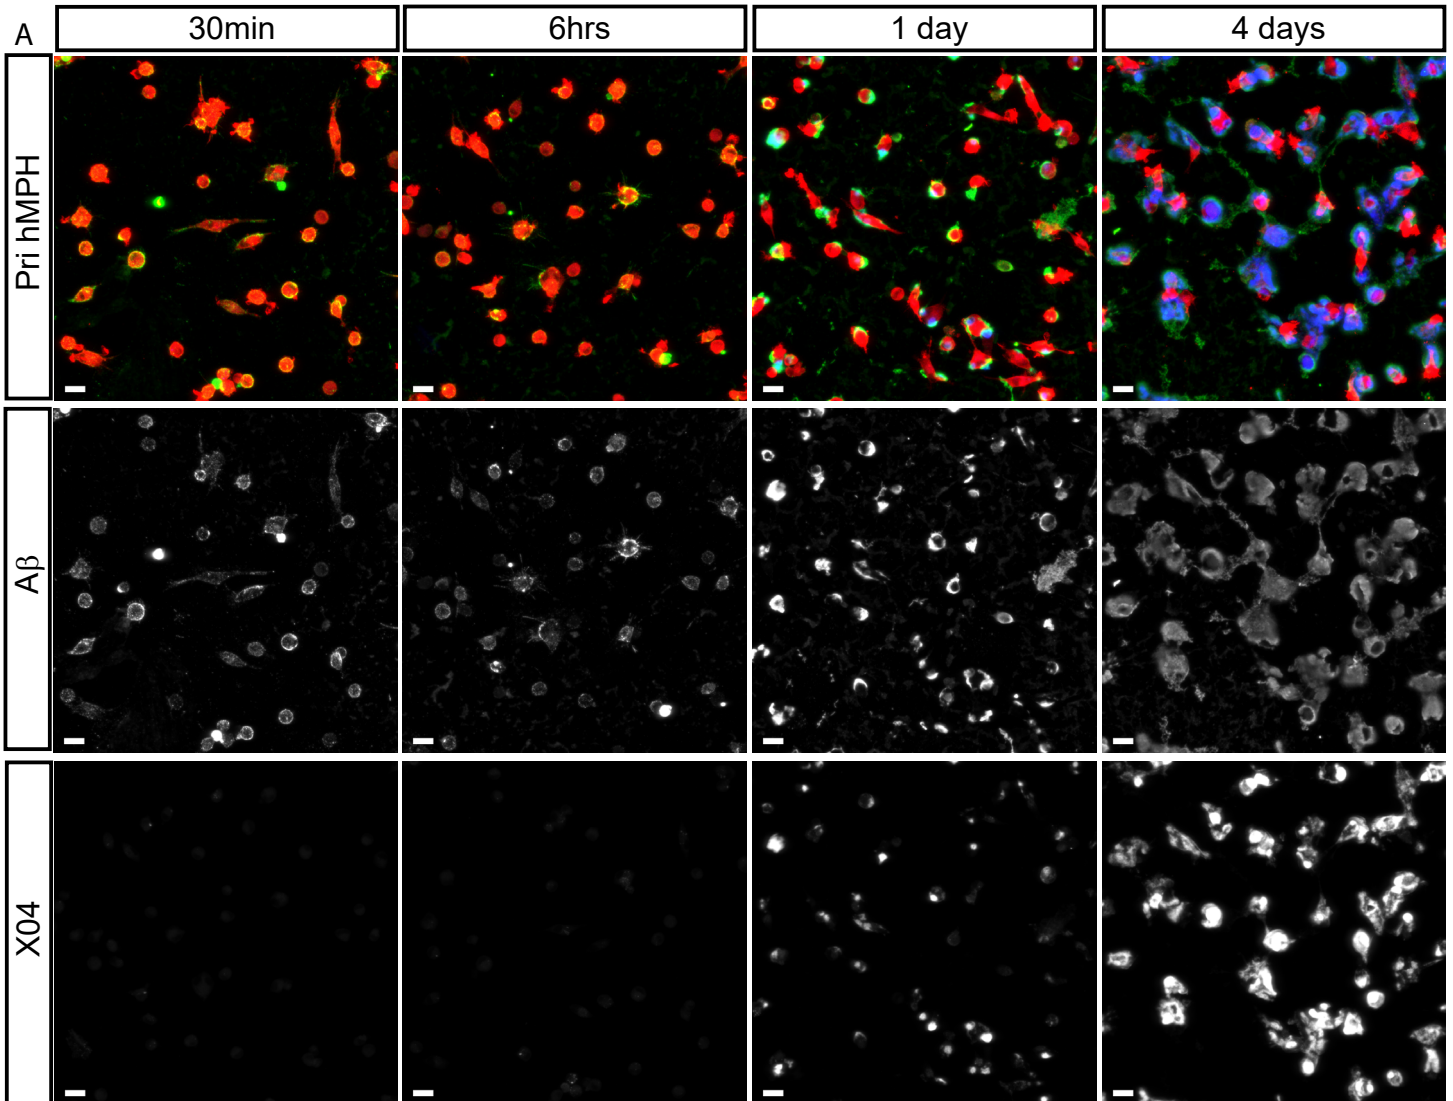

Supplementary Fig. 9 | Human primary macrophages generate internalized A $\beta$ -plaque. (A) Human CD14-derived macrophages were treated with 5  $\mu$ M sA $\beta$ 42s, then fixed and stained after 30 minutes, 6 hours, 1 day, and 4 days. Macrophages (IBA1, red) continuously internalize A $\beta$  (green; white - second row) over the course of 4 days and form intracellular X04-positive (blue; white - bottom row) aggregates. All scale bars = 50 $\mu$ m.

Supplementary Fig. 10

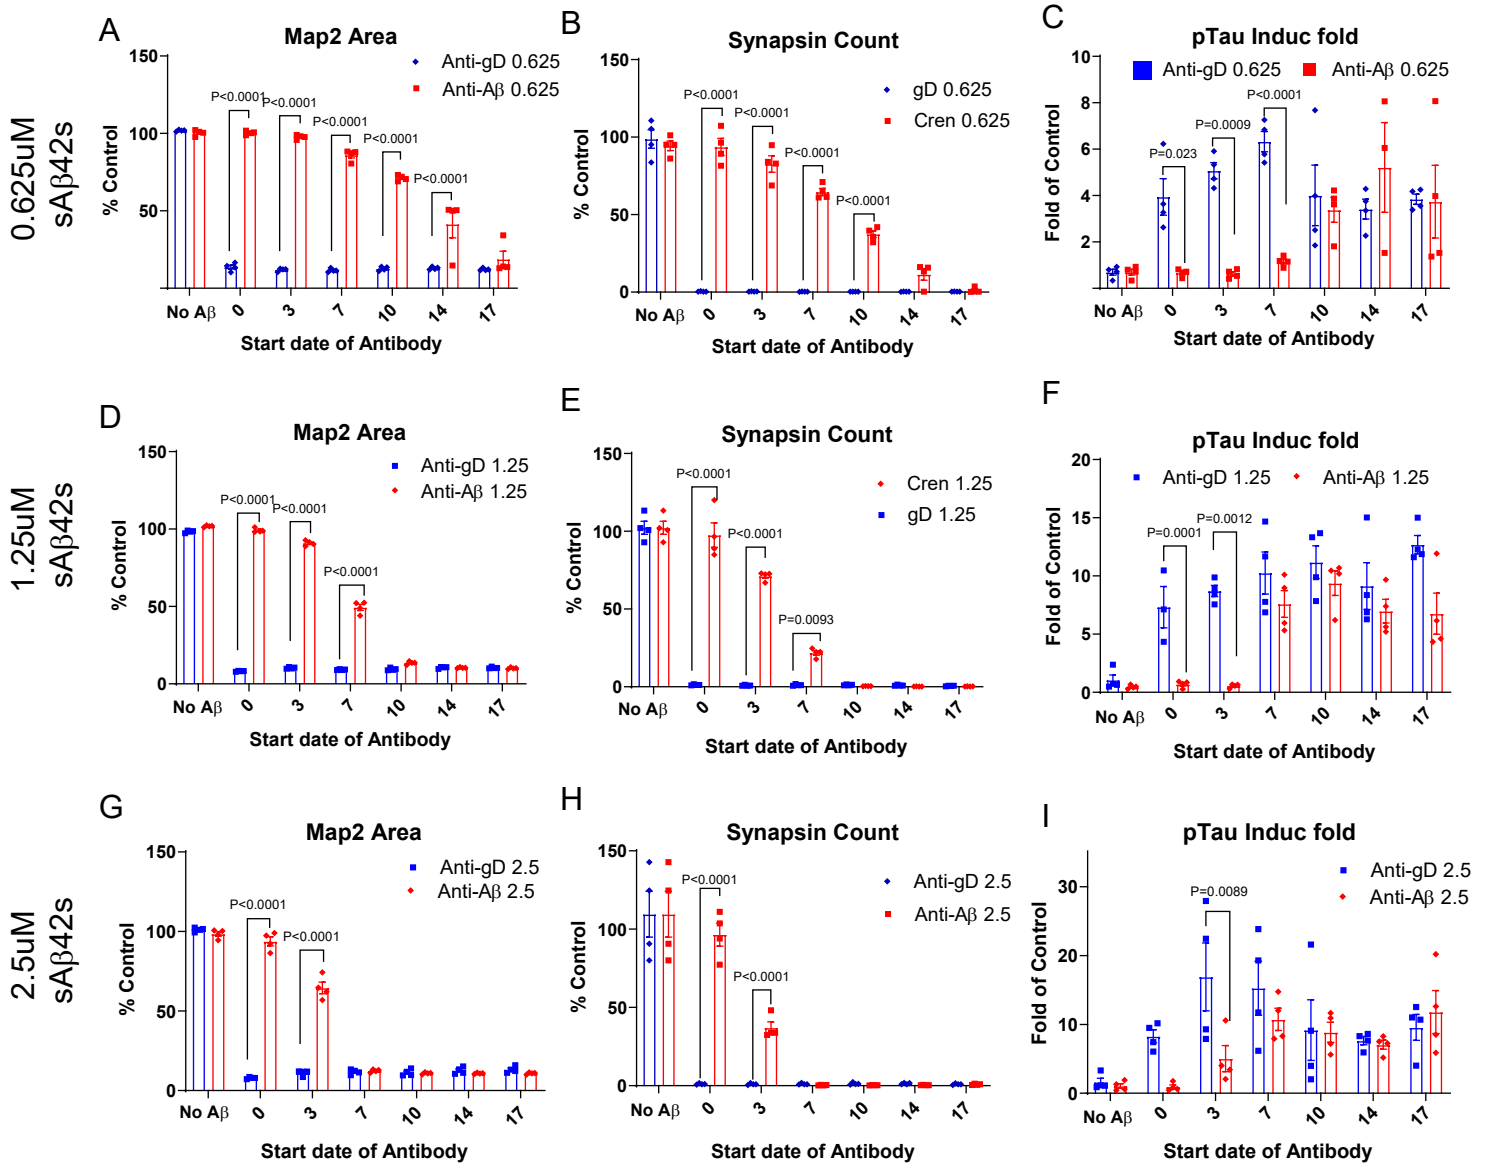

Supplementary Fig. 10 | Anti-Aβ antibody intervention window reduced by faster disease progression. (A-C) Repeated dosing schedule of 12-week old human iPSC neuron cultured with twice a week dosed 0.625 μM of sAβ42s. 0.625 μM Anti-Aβ antibodies (red) or anti-gD control antibodies (blue) were started at indicated time points for repeated dosing regimens. All cells were treated in the same plate and fixed at 21 days post-first dose. MAP2 area (A), synapsin count (B), and p-Tau induction fold (C) were quantified. (D-F) Same experimental set-up but with 1.25 μM of sAβ42s, 1.25 μM Anti-Aβ antibodies (red) or anti-gD control antibodies (blue). (G-I) Same experimental setup but with 2.5 μM of sAβ42s, 2.5 μM Anti-Aβ antibodies (red) or anti-gD control antibodies (blue). Data are presented as mean values +/- SEM and n=4 wells. Two-way ANOVA with Tukey's multiple comparisons test.

**Supplementary Movie 1 | Human iPSC microglia exhibit dynamic activities during A $\beta$  plaque formation.** Live cell imaging movie (30 minutes/second) using 10X objective and Incucyte Zoom software over a 7-day timelapse shows human iPSC microglia (phase) exhibit dynamic activities and aggregate 5uM 5% HiLyte-555 labeled sA $\beta$ 42s (red) into A $\beta$  plaque-like structures.

**Supplementary Movie 2 | Human CD14-derived macrophages continuously internalize A $\beta$  and do not form extracellular plaques.** Live cell imaging movie (30 minutes/second) using 10X objective and Incucyte Zoom software over a 7-day timelapse shows human CD14-derived macrophages (phase) show low motility when treated with 5uM 5% HiLyte-555 labeled sA $\beta$ 42s (red) and continuously internalize A $\beta$

**Supplementary Movie 3 | Human iPSC microglia exhibit dynamic activities during A $\beta$  plaque formation.** Live cell imaging movie (30 minutes/second) using 10X objective and Incucyte Zoom software over a 7-day timelapse with human iPSC microglia (phase) treated with 5uM sA $\beta$ 42s labeled by HiLyte555 and pHrodo Green. Microglia (phase) continuously internalize A $\beta$  (green) before plaque formation (red) in the center of a group of cultured microglia.



**Supplementary Table 1. Description of small molecules used in the focused screen.**

| Name                       | Cat. No.   | Vendor             | Bioactivity Information/ Description                                                                      | Dose               | Neuroprotective citation |
|----------------------------|------------|--------------------|-----------------------------------------------------------------------------------------------------------|--------------------|--------------------------|
| PD0325901                  | 4192       | Tocris             | MEK1/2 inhibitor; Prevents neuronal death caused by oxidative stress                                      | 5 mg/kg            | Ku et al. 2018           |
| LM22A4                     | 4607       | Tocris             | TrkB agonist; Neurotrophic                                                                                | 0.001-1000 nM      | Massa et al. 2010        |
| 7,8-Dihydroxyflavone       | 3826       | Tocris             | TrkB agonist. Neurotrophic                                                                                | 5 mg/kg            | Andero et al. 2012       |
| LM11A 31 dihydrochloride   | 5046       | Tocris             | p75NTR agonist; Increase survival signaling and inhibit amyloid- $\beta$ -induced degenerative signaling  | 50 mg/kg           | Simmons et al. 2014      |
| (S)-(-)-Blebbistatin       | 1852       | Tocris             | Myosin II ATPase inhibitor; Prevents oxidative stress-induced neuronal apoptosis                          | 1 $\mu$ M          | Wang et al. 2017         |
| BI-6C9                     | Sc-210915A | Santa Cruz Biotech | tBID inhibitor; Protects from glutamate-induced neuronal death                                            | 10 $\mu$ M         | Landshamer et al. 2008   |
| Bongkreic acid solution    | B6179      | Sigma              | ANT inhibitor; Protects against NMDA receptor-mediated neuronal apoptosis                                 | 4-16 $\mu$ g/kg    | Muranyi et al. 2005      |
| Sodium butyrate            | 3850       | Tocris             | HDAC inhibitor; Anti-inflammatory and neuroprotective                                                     | 1.2 g/kg           | Kilgore et al. 2010      |
| Trichostatin A             | 1406       | Tocris             | HDAC inhibitor; Anti-inflammatory and neuroprotective                                                     | 5-10 mg/kg         | Fleiss et al. 2012       |
| Calpeptin                  | sc-202516  | Santa Cruz Biotech | Calpain-2 inhibitor; Prevents neuronal apoptosis                                                          | 2 $\mu$ M          | Das et al. 2006          |
| Kynurenic Acid Sodium Salt | 3694       | Tocris             | Nonspecific antagonist of excitatory amino acid receptors; Protects from glutamate-induced neuronal death | 300 mg/kg          | Leib et al. 1996         |
| Necrostatin-1              | sc-200142  | Santa Cruz Biotech | RIPK1 inhibitor; Block necroptosis and protect dopaminergic neurons                                       | 0.1-100 $\mu$ M    | Degterev et al. 2005     |
| BAX Inhibiting Peptide V5  | B1436      | Sigma              | BAX inhibitor; Inhibits neuronal apoptosis                                                                | 5 $\mu$ L, 5 mg/mL | Wang et al. 2010         |
| Ivachtin                   | 2788-5     | BioVision          | Caspase-3 inhibitor; Inhibits neuronal apoptosis                                                          | 0.5-50 $\mu$ M     | Poksay et al. 2017       |
| Cdk2 Inhibitor II          | 219445     | Calbiochem         | CDK2 inhibitor; Inhibits neuronal apoptosis triggered                                                     | 4 $\mu$ M          | Ye et al. 2010           |

|                             |                  |             |                                                                                                        |                  |                                     |
|-----------------------------|------------------|-------------|--------------------------------------------------------------------------------------------------------|------------------|-------------------------------------|
|                             |                  |             | by inappropriate activation of CDK                                                                     |                  |                                     |
| SB 218078                   | 2560             | Tocris      | Chk1 inhibitor                                                                                         | 5 $\mu$ M        | Gonzalez et al. 2015                |
| PD 0332991 isethionate      | 4786             | Tocris      | CDK inhibitor; Inhibits neuronal apoptosis triggered by inappropriate activation of CDK                | 100 mg/kg        | Marathe et al. 2015                 |
| Purvalanol A                | 1580             | Tocris      | CDK inhibitor; Inhibits neuronal apoptosis triggered by inappropriate activation of CDK                | 75 nM            | Kuruva et al. 2016                  |
| Olomoucine                  | 1284             | Tocris      | CDK inhibitor; Inhibits neuronal apoptosis triggered by inappropriate activation of CDK                | 1-100 $\mu$ M    | Di Giovanni et al. 2005             |
| GW8510                      | G7791            | Sigma       | CDK2 inhibitor; Inhibits neuronal apoptosis triggered by Inappropriate activation of CDK               | 1-10 $\mu$ M     | Johnson et al. 2005                 |
| SB216763                    | S1075            | Selleckchem | GSK-3 $\beta$ Inhibitor; Protects against axon degeneration                                            | 3 $\mu$ M        | Liang and Chuang 2006               |
| TDZD-8                      | ALX-270-354-M005 | Enzo        | GSK-3 $\beta$ Inhibitor; Protects against axon degeneration                                            | 3.3 & 10 $\mu$ M | Martinez et al. 2002                |
| IM-12                       | SML0084          | Sigma       | GSK-3 $\beta$ Inhibitor; Protects against axon degeneration                                            | 1 $\mu$ M        | Shan et al. 2017                    |
| CHIR 99021 trihydrochloride | 4953             | Tocris      | GSK-3 $\beta$ Inhibitor; Protects against axon degeneration                                            | 3.1-25 mg/kg     | Pan et al. 2011                     |
| Saracatinib (AZD0530)       | S1006            | Selleckchem | Fyn inhibitor; Neuroprotective                                                                         | 2-1000 nM        | Nygaard, Dyck and Strittmatter 2014 |
| SU6656                      | S7774            | Selleckchem | Fyn inhibitor; Neuroprotective                                                                         | 5 $\mu$ M        | Johnson et al. 2005                 |
| sun11602                    | 4826             | Tocris      | Fyn inhibitor; Neuroprotective                                                                         | 1 & 3 $\mu$ M    | Murayama et al. 2013                |
| GM 6001                     | 2983             | Tocris      | Matrix metalloproteinase inhibitor                                                                     | 5 $\mu$ g/mouse  | Shichi et al. 2011                  |
| Indirubin-3'-monoxime       | 1813             | Tocris      | GSK3 $\beta$ and CDK inhibitor; Protects against axon degeneration; Anti-apoptotic and neuroprotective | 0.04-20 $\mu$ M  | Rudhard et al. 2015                 |
| AS601245                    | ALX-270-443-M005 | Tocris      | JNK inhibitor.; Anti-inflammatory And neuroprotective                                                  | 0.04-20 $\mu$ M  | Rudhard et al. 2015                 |
| P7C3                        | 4076             | Tocris      | NAMPT activator; Proneurogenic and neuroprotective                                                     | 5-40 mg/kg       | Pieper et al. 2010                  |

|                            |               |                |                                                                                                           |                 |                                   |
|----------------------------|---------------|----------------|-----------------------------------------------------------------------------------------------------------|-----------------|-----------------------------------|
| Daunorubicin hydrochloride | 1467          | Tocris         | Increases gangliosides (Especially GQ1b) expression in differentiating neuronal cells                     | 0.04-20 $\mu$ M | Rudhard et al. 2015               |
| MG-132                     | 1748          | Tocris         | Calpain inhibitor; protease inhibitor                                                                     | 0.04-20 $\mu$ M | Rudhard et al. 2015               |
| Capsazepine                | 0464          | Tocris         | Vanilloid receptor antagonist; Anti-inflammatory                                                          | 0.04-20 $\mu$ M | Rudhard et al. 2015               |
| SU 11248                   | 3768          | Tocris         | Inhibitor of multiple receptor transduction kinases                                                       | 0.04-20 $\mu$ M | Rudhard et al. 2015               |
| SU 6668                    | 3335          | Tocris         | PDGFR, VEGFR and FGFR inhibitor                                                                           | 0.04-20 $\mu$ M | Rudhard et al. 2015               |
| Ac-Leu-Leu-Nle-CHO         | BML-P120-0005 | Tocris         | calpain I, calpain II, cathepsin L inhibitor; Prevents neuronal apoptosis                                 | 0.04-20 $\mu$ M | Rudhard et al. 2015               |
| MDL 28170                  | 1146          | Tocris         | Calpain and Cathepsin B inhibitor; Prevents neuronal apoptosis                                            | 0.04-20 $\mu$ M | Rudhard et al. 2015               |
| SB 239063                  | 1962          | Tocris         | p38 MAPK inhibitor; Protects against axon degeneration                                                    | 0.04-20 $\mu$ M | Rudhard et al. 2015               |
| BAY 11-7082                | 1744          | Tocris         | NF- $\kappa$ B inhibitor; Anti-inflammatory And neuroprotective                                           | 0.04-20 $\mu$ M | Rudhard et al. 2015               |
| Luteolin                   | 2874          | Tocris         | Anti-inflammatory, antioxidant and free radical scavenger. Induces Nrf2 and inhibits caspase-3 activation | 0.04-20 $\mu$ M | Rudhard et al. 2015               |
| Teniposide                 | SML0609       | Sigma          | Topoisomerase II inhibitor; Inhibits DNA synthesis                                                        | 0.04-20 $\mu$ M | Rudhard et al. 2015               |
| 2-TEDC                     | 0645          | Tocris         | 5-, 12-, -15- lipoxygenase inhibitor; Protects against axon degeneration                                  | 0.04-20 $\mu$ M | Rudhard et al. 2015               |
| SB 415286                  | 1617          | Tocris         | GSK-3 $\beta$ inhibitor; Protects against axon degeneration                                               | 0.04-20 $\mu$ M | Rudhard et al. 2015               |
| FK 506                     | 3631          | Tocris         | Calcineurin inhibitor; Neuroprotective                                                                    | 0.5-1 mg/kg     | Sierra-Paredes and Sierra-Marcuno |
| STEARDA                    | 2204          | Tocris         | 5-LO (5-lipoxygenase) inhibitor; Protects against axon degeneration                                       | 0.04-20 $\mu$ M | Rudhard et al. 2015               |
| Arctigenin                 | 1777          | Tocris         | MKK1 and IKBa inhibitor, neuroprotective by binding to kainate receptors                                  | 0.04-20 $\mu$ M | Rudhard et al. 2015               |
| Lycorine hydrochloride     | HY-N0289      | MedChemExpress | p21CIP1/WAF1 activator; Inhibits caspase-3 and prevents apoptosis                                         | 0.04-20 $\mu$ M | Rudhard et al. 2015               |
| NKH 477                    | 1603          | Tocris         | Adenylyl cyclase activator                                                                                | 0.04-20 $\mu$ M | Rudhard et al. 2015               |

|                              |                  |                    |                                                                                                                                        |                 |                                  |
|------------------------------|------------------|--------------------|----------------------------------------------------------------------------------------------------------------------------------------|-----------------|----------------------------------|
| Demeclocycline hydrochloride | HY-17560         | MedChemExpress     | Calpain inhibitor; Prevents neuronal apoptosis                                                                                         | 0.04-20 $\mu$ M | Rudhard et al. 2015              |
| PDI Inhibitor 16F16          | SML0021          | Sigma              | PDI Inhibitor. Prevents apoptosis induced by misfolded proteins                                                                        | 0.5-100 $\mu$ M | Hoffstrom et al. 2010            |
| JWH 015                      | 1341             | Tocris             | cannabinoid (CB2) receptor agonist                                                                                                     | 0.04-20 $\mu$ M | Rudhard et al. 2015              |
| GW 5074                      | 1381             | Tocris             | cRaf1 kinase inhibitor                                                                                                                 | 0.04-20 $\mu$ M | Rudhard et al. 2015              |
| GBR 12783 dihydrochloride    | 0513             | Tocris             | Dopamine uptake inhibitor                                                                                                              | 0.04-20 $\mu$ M | Rudhard et al. 2015              |
| Baicalein                    | 1761             | Tocris             | 5-, and 12-lipoxygenase Inhibitor; Protects against axon degeneration                                                                  | 0.04-20 $\mu$ M | Rudhard et al. 2015              |
| GNE-3511                     | HY-12947         | MedChemExpress     | DLK inhibitor; Protects against neuronal and synaptic loss                                                                             | 0.04-20 $\mu$ M | Pichon et al                     |
| Edaravone                    | 0786             | Tocris             | Free radical scavenger; Protects from ROS-induced neurotoxicity                                                                        | 1 & 3 mg/kg     | Kawasaki et al. 2007             |
| C 646                        | 4200             | Tocris             | p300/CBP (HAT) inhibitor                                                                                                               | 20 $\mu$ M      | Formisano et al. 2015            |
| Zileuton                     | 3308             | Tocris             | 5-lipoxygenase (5-LOX) inhibitor                                                                                                       | 0.04-20 $\mu$ M | Rudhard et al. 2015              |
| TRO 19622                    | 2906             | Tocris             | Mitochondrial permeability transition pore inhibitor; Neuroprotective                                                                  | 0.1-10 $\mu$ M  | Bordet et al. 2007               |
| Resveratrol                  | 1418             | Tocris             | Cyclooxygenase inhibitor. Antioxidant, neuroprotective against A $\beta$ -related neurotoxicity                                        | 0.1-50 $\mu$ M  | Bastianetto, Menard, and Quirion |
| IU1                          | 4088             | Tocris             | Deubiquitinating enzyme USP14 inhibitor; Reduce protein aggregates and protects from neuronal loss                                     | 400 $\mu$ g/kg  | Min et al. 2017                  |
| ISR Inhibitor, ISRIB         | 509584           | Calbiochem         | Integrated stress response (ISR) Inhibitor; Prevents neuronal cell death through inhibition of amyloid $\beta$ -induced ATF4 induction | 0.5-100 nM      | Hosoi et al. 2016                |
| CTPB                         | ALX-420-033-M005 | Enzo Life Sciences | p300 histone acetyltransferase (HAT) activator                                                                                         | 0.5-200 $\mu$ M | Hegarty et al. 2016              |
| Fluorobexarotene             | 4064             | Tocris             | RXR agonist; Stimulates the metabolic clearance of A $\beta$                                                                           | 20 mg/kg        | Bachmeier et al. 2013            |

|                   |              |                        |                                                                                         |                          |                        |
|-------------------|--------------|------------------------|-----------------------------------------------------------------------------------------|--------------------------|------------------------|
| AK 7              | 4754         | Tocris                 | SIRT2 inhibitor;<br>Neuroprotective in<br>Huntington's and<br>Parkinson's murine models | 10, 20, &<br>30<br>mg/kg | Chopra et al. 2012     |
| Epicatechin       | HY-<br>N0001 | MedChemEx<br>p<br>ress | Anti-oxidant and anti-<br>inflammatory;<br>Neuroprotective                              | 10 mg/kg                 | Pinto et al 2015       |
| Guggulsterone     | 2013         | Tocris                 | Steroid receptors antagonist;<br>Anti-inflammatory in<br>microglia                      | 30 & 60<br>mg/kg         | Chen, Huang, Ding 2016 |
| Clusterin Protein | 2937-HS      | R&D systems            | Prevents A $\beta$ aggregation<br>and<br>Fibrillization; Anti-<br>apoptotic             |                          | Pucci et al. 2008      |
| Neuropathiazol    | 5186         | Tocris                 | Neuronal differentiation<br>inducer in hippocampal<br>neural<br>progenitors             | 0.6-5 $\mu$ M            | Wurdak et al. 2010     |

**Supplementary Table 2. Double culture focused screen results**

| <b>Compound</b>              | <b>Known Axon Protection Effect?</b> | <b>Conc. (<math>\mu</math>M)</b> | <b>% MAP2 rescue</b> | <b>% Cux2 rescue</b> | <b>% Synapse rescue</b> | <b>% B3T rescue</b> |
|------------------------------|--------------------------------------|----------------------------------|----------------------|----------------------|-------------------------|---------------------|
| (S)-(-)-Blebbistatin         | No                                   | 50                               | 34%                  | 23%                  | 12%                     | 49%                 |
|                              |                                      | 25                               | 34%                  | 5%                   | 13%                     | 38%                 |
|                              |                                      | 12.5                             | 25%                  | 3%                   | 15%                     | 34%                 |
|                              |                                      | 6.25                             | 21%                  | 10%                  | 19%                     | 41%                 |
| 2-TEDC                       | Yes                                  | 50                               | 22%                  | 16%                  | 10%                     | 31%                 |
| 7,8-Dihydroxyflavone         | No                                   | 50                               | 6%                   | 42%                  | -2%                     | -14%                |
| Ac-Leu-Leu-Nle-CHO           | Yes                                  | 50                               | 23%                  | 78%                  | 2%                      | 0%                  |
|                              |                                      | 25                               | 20%                  | 87%                  | -5%                     | -11%                |
|                              |                                      | 12.5                             | 18%                  | 87%                  | -4%                     | 0%                  |
|                              |                                      | 6.25                             | 31%                  | 85%                  | 0%                      | 14%                 |
| Calpeptin                    | Yes                                  | 50                               | 36%                  | 96%                  | 15%                     | 20%                 |
|                              |                                      | 25                               | 39%                  | 91%                  | 9%                      | 7%                  |
|                              |                                      | 12.5                             | 27%                  | 79%                  | 11%                     | 4%                  |
|                              |                                      | 6.25                             | 22%                  | 70%                  | 6%                      | 9%                  |
| Demeclocycline hydrochloride | Yes                                  | 50                               | 39%                  | 33%                  | 27%                     | 63%                 |
|                              |                                      | 25                               | 23%                  | 6%                   | 15%                     | 35%                 |
| MDL 28170                    | Yes                                  | 50                               | 26%                  | 57%                  | 23%                     | 47%                 |
|                              |                                      | 25                               | 36%                  | 84%                  | 11%                     | 25%                 |
|                              |                                      | 12.5                             | 33%                  | 74%                  | 9%                      | 22%                 |

|                            |     |      |       |      |      |      |
|----------------------------|-----|------|-------|------|------|------|
|                            |     | 6.25 | 33%   | 81%  | 10%  | 18%  |
| AK 7                       | No  | 50   | -17%  | 0%   | -5%  | 42%  |
| AS601245                   | Yes | 50   | 64%   | 123% | 19%  | -16% |
|                            |     | 25   | 73%   | 32%  | 36%  | 11%  |
|                            |     | 12.5 | 67%   | 13%  | 57%  | 20%  |
|                            |     | 6.25 | 49%   | 9%   | 37%  | 14%  |
| BAY 11-7082                | Yes | 25   | 17%   | 82%  | -13% | 14%  |
|                            |     | 12.5 | 36%   | 85%  | -3%  | 31%  |
|                            |     | 6.25 | 34%   | 70%  | -2%  | 38%  |
| Luteolin                   | Yes | 50   | 55%   | 19%  | 37%  | 66%  |
|                            |     | 25   | 26%   | 12%  | 13%  | 29%  |
| MG-132                     | Yes | 50   | 25%   | 90%  | 4%   | 57%  |
|                            |     | 25   | 26%   | 91%  | 8%   | 30%  |
|                            |     | 12.5 | 24%   | 87%  | 4%   | 7%   |
|                            |     | 6.25 | 18%   | 80%  | -6%  | -3%  |
| C 646                      | No  | 50   | 54%   | 25%  | 19%  | 49%  |
| Daunorubicin hydrochloride | Yes | 50   | -124% | -39% | -27% | 101% |
|                            |     | 25   | -122% | -23% | -27% | 73%  |
| GNE-3511                   | Yes | 50   | 87%   | 81%  | 47%  | 58%  |
|                            |     | 25   | 49%   | 36%  | 14%  | 17%  |
|                            |     | 6.25 | 32%   | 18%  | 7%   | 15%  |
| GW 5074                    | Yes | 50   | 54%   | 162% | 8%   | 48%  |
|                            |     | 25   | 19%   | 115% | 8%   | 14%  |
|                            |     | 12.5 | 12%   | 76%  | 6%   | 9%   |
|                            |     | 6.25 | 17%   | 95%  | 8%   | 16%  |
| GW8510                     | No  | 50   | 52%   | -22% | 49%  | 47%  |
|                            |     | 25   | 37%   | -18% | 38%  | 31%  |
|                            |     | 12.5 | 37%   | 16%  | 38%  | 20%  |
|                            |     | 6.25 | 48%   | -1%  | 52%  | 32%  |
| PD 0332991 isethionate     | No  | 50   | -97%  | -37% | -15% | 69%  |
| Necrostatin-1              | Yes | 50   | 37%   | 10%  | 15%  | 11%  |
| NKH 477                    | Yes | 50   | 44%   | 45%  | -5%  | 38%  |
|                            |     | 25   | 43%   | 21%  | -4%  | 35%  |
|                            |     | 12.5 | 45%   | 24%  | 5%   | 38%  |
|                            |     | 6.25 | 39%   | 21%  | 7%   | 38%  |
| PDI Inhibitor 16F16        | No  | 50   | -12%  | 34%  | -13% | -22% |
|                            |     | 25   | -10%  | 66%  | -8%  | -46% |
|                            |     | 12.5 | 1%    | 45%  | -1%  | 3%   |
|                            |     | 6.25 | 6%    | 46%  | 5%   | 27%  |

|                          |     |      |      |      |      |       |
|--------------------------|-----|------|------|------|------|-------|
| Saracatinib<br>(AZD0530) | No  | 25   | 65%  | 18%  | 10%  | 30%   |
|                          |     | 12.5 | 71%  | 13%  | 34%  | 56%   |
|                          |     | 6.25 | 61%  | 7%   | 32%  | 62%   |
| SU6656                   | No  | 50   | 3%   | 106% | 11%  | -188% |
|                          |     | 25   | 3%   | 126% | 15%  | -37%  |
|                          |     | 12.5 | 4%   | 120% | 11%  | 3%    |
|                          |     | 6.25 | 5%   | 101% | 13%  | 4%    |
| SB 218078                | No  | 50   | -92% | -39% | -15% | 72%   |
| SB 415286                | Yes | 50   | 19%  | -13% | 12%  | 39%   |
| SU 11248                 | Yes | 25   | 16%  | 59%  | 4%   | -19%  |
|                          |     | 50   | 7%   | 115% | 21%  | 4%    |
| Teniposide               | Yes | 50   | 21%  | -18% | 6%   | 34%   |

**Supplementary Table 3. Triple culture focused screen results**

| <b>Compound</b>      | <b>Known Axon Protection Effect?</b> | <b>Conc. (µM)</b> | <b>% MAP2 rescue</b> | <b>% Synapse rescue</b> | <b>% B3T rescue</b> |
|----------------------|--------------------------------------|-------------------|----------------------|-------------------------|---------------------|
| TRO 19622            | No                                   | 12.50             | -36                  | -13%                    | 33%                 |
|                      |                                      | 3.13              | -25%                 | -10%                    | 34%                 |
| AK 7                 | No                                   | 50.00             | 28%                  | 17%                     | 56%                 |
|                      |                                      | 12.50             | 53%                  | 42%                     | 81%                 |
|                      |                                      | 3.13              | 18%                  | 13%                     | 77%                 |
|                      |                                      | 0.78              | 1%                   | 3%                      | 79%                 |
| Resveratrol          | No                                   | 50.00             | 84%                  | 78%                     | 78%                 |
|                      |                                      | 12.50             | 57%                  | 49%                     | 54%                 |
|                      |                                      | 3.13              | 33%                  | 27%                     | 30%                 |
|                      |                                      | 0.78              | 33%                  | 24%                     | 27%                 |
| Epicatechin          | No                                   | 50.00             | 28%                  | 20%                     | 30%                 |
| IU1                  | No                                   | 12.50             | 32%                  | 23%                     | 41%                 |
| Guggulsterone        | No                                   | 50.00             | 19%                  | 17%                     | 36%                 |
| ISR Inhibitor, ISRIB | No                                   | 50.00             | 31%                  | 21%                     | 22%                 |
| C 646                | No                                   | 50.00             | 37%                  | 39%                     | 53%                 |
|                      |                                      | 12.50             | 41%                  | 38%                     | 42%                 |
|                      |                                      | 0.78              | 37%                  | 28%                     | 27%                 |
| Neuropathiazol       | No                                   | 50.00             | 27%                  | 28%                     | 35%                 |

|                        |     |       |      |      |     |
|------------------------|-----|-------|------|------|-----|
|                        |     | 12.50 | 44%  | 42%  | 35% |
| Fluorobexarotene       | No  | 12.50 | 40%  | 33%  | 33% |
|                        |     | 3.13  | 43%  | 34%  | 50% |
| GNE-3511               | Yes | 50.00 | 66%  | 56%  | 65% |
|                        |     | 12.50 | 102% | 81%  | 82% |
|                        |     | 3.13  | 95%  | 77%  | 81% |
|                        |     | 0.78  | 91%  | 79%  | 85% |
| Ac-Leu-Leu-Nle-CHO     | Yes | 12.50 | 48%  | 18%  | 44% |
|                        |     | 3.13  | 55%  | 38%  | 57% |
|                        |     | 0.78  | 21%  | 14%  | 38% |
| 2-TEDC                 | Yes | 50.00 | 48%  | 40%  | 73% |
|                        |     | 12.50 | 25%  | 17%  | 43% |
|                        |     | 3.13  | 22%  | 15%  | 40% |
| NKH 477                | Yes | 50.00 | 53%  | 38%  | 81% |
|                        |     | 12.50 | 9%   | 8%   | 49% |
|                        |     | 3.13  | 17%  | 12%  | 42% |
| MDL 28170              | Yes | 50.00 | 47%  | 41%  | 73% |
|                        |     | 12.50 | 31%  | 8%   | 33% |
|                        |     | 0.78  | 19%  | 10%  | 30% |
| SB 415286              | Yes | 50.00 | 42%  | 40%  | 78% |
| FK 506                 | No  | 12.50 | 34%  | 34%  | 52% |
| PDI Inhibitor 16F16    | No  | 50.00 | -5%  | -1%  | 42% |
|                        |     | 12.50 | -6%  | 8%   | 43% |
|                        |     | 3.13  | 44%  | 43%  | 71% |
| BAY 11-7082            | Yes | 50.00 | 21%  | -1%  | 44% |
| STEARDA                | No  | 12.50 | 24%  | 21%  | 33% |
|                        |     | 3.13  | 28%  | 24%  | 33% |
|                        |     | 0.78  | 30%  | 24%  | 27% |
| JWH 015                | No  | 50.00 | 38%  | 26%  | 42% |
|                        |     | 12.50 | 50%  | 43%  | 60% |
| Luteolin               | Yes | 50.00 | 73%  | 75%  | 91% |
| Teniposide             | Yes | 50.00 | -19% | 3%   | 52% |
|                        |     | 12.50 | -17% | 3%   | 50% |
|                        |     | 3.13  | -10% | 5%   | 42% |
|                        |     | 0.78  | -7%  | 1%   | 35% |
| Lycorine hydrochloride | Yes | 50.00 | 88%  | 75%  | 79% |
|                        |     | 12.50 | 93%  | 77%  | 83% |
|                        |     | 3.13  | 99%  | 80%  | 77% |
|                        |     | 0.78  | 57%  | 43%  | 37% |
| Olomoucine             | No  | 50.00 | -8%  | -15% | 69% |



|                             |     |       |      |      |      |
|-----------------------------|-----|-------|------|------|------|
| Saracatinib (AZD0530)       | No  | 12.50 | -12% | -2%  | 35%  |
|                             |     | 3.13  | 73%  | 65%  | 99%  |
|                             |     | 0.78  | 72%  | 65%  | 99%  |
| P7C3                        | No  | 50.00 | -8%  | 2%   | 43%  |
|                             |     | 3.13  | 2%   | 3%   | 30%  |
| GW8510                      | No  | 50.00 | -8%  | -15% | 63%  |
|                             |     | 12.50 | 28%  | 32%  | 68%  |
|                             |     | 3.13  | 15%  | 25%  | 70%  |
|                             |     | 0.78  | -4%  | 8%   | 45%  |
| SU6656                      | No  | 50.00 | 40%  | 36%  | 48%  |
|                             |     | 12.50 | 53%  | 49%  | 71%  |
|                             |     | 3.13  | 72%  | 64%  | 92%  |
|                             |     | 0.78  | 58%  | 51%  | 80%  |
| Daunorubicin hydrochloride  | Yes | 0.78  | 74%  | 52%  | 68%  |
| SB216763                    | No  | 50.00 | -24% | -15% | 46%  |
| sun11602                    | No  | 50.00 | 14%  | 11%  | 47%  |
|                             |     | 12.50 | 19%  | 15%  | 43%  |
|                             |     | 3.13  | 10%  | 11%  | 33%  |
| MG-132                      | Yes | 50.00 | 25%  | -11% | 46%  |
|                             |     | 12.50 | 18%  | -7%  | 35%  |
| TDZD-8                      | No  | 50.00 | -29% | -8%  | 54%  |
| Capsazepine                 | Yes | 12.50 | 44%  | 44%  | 50%  |
| Indirubin-3'-monoxime       | Yes | 50.00 | 23%  | 34%  | 49%  |
|                             |     | 12.50 | 37%  | 44%  | 74%  |
|                             |     | 3.13  | 6%   | 9%   | 31%  |
| SU 11248                    | Yes | 3.13  | 88%  | 77%  | 74%  |
|                             |     | 0.78  | 73%  | 68%  | 69%  |
| CHIR 99021 trihydrochloride | No  | 50.00 | 58%  | 46%  | 66%  |
| AS601245                    | Yes | 50.00 | 95%  | 45%  | 44%  |
|                             |     | 12.50 | 74%  | 26%  | 26%  |
|                             |     | 3.13  | 54%  | 17%  | 18%  |
| SU 6668                     | No  | 50.00 | 80%  | 75%  | 77%  |
|                             |     | 3.13  | 31%  | 26%  | 34%  |
| Calpeptin                   | Yes | 50.00 | 34%  | 34%  | 66%  |
| SB 218078                   | No  | 50.00 | 53%  | 19%  | -11% |
|                             |     | 0.78  | 10%  | 14%  | 38%  |
| BI-6C9                      | No  | 50.00 | 58%  | 55%  | 65%  |
| PD0325901                   | No  | 50.00 | 27%  | 27%  | 59%  |
|                             |     | 12.50 | 8%   | 8%   | 43%  |
|                             |     | 3.13  | 23%  | 21%  | 52%  |

|                           |    |       |      |      |     |
|---------------------------|----|-------|------|------|-----|
|                           |    | 0.78  | 19%  | 15%  | 48% |
| BAX Inhibiting Peptide V5 | No | 12.50 | -6%  | 14%  | 32% |
| Trichostatin A            | No | 50.00 | -13% | 1%   | 41% |
|                           |    | 12.50 | -18% | 2%   | 31% |
| (S)-(-)-Blebbistatin      | No | 50.00 | 24%  | 20%  | 36% |
| PD 0332991 isethionate    | No | 50.00 | -79% | -29% | 90% |
| Purvalanol A              | No | 3.13  | 15%  | 24%  | 33% |
