# Supplementary material for: Improved modeling of human AD with an automated culturing platform for iPSC neurons, astrocytes and microglia
Source: PubMed Central journal article supplement (PMC8410795; doi:10.1038/s41467-021-25344-6), 2021-09-01
Supplement: 41467_2021_25344_MOESM2_ESM.pdf [file 41467_2021_25344_MOESM2_ESM.pdf]

## Description of Additional Supplementary Files

**Supplementary Movie 1 | Human iPSC microglia exhibit dynamic activities during A $\beta$  plaque formation.** Live cell imaging movie (30 minutes/second) using 10X objective and Incucyte Zoom software over a 7-day timelapse shows human iPSC microglia (phase) exhibit dynamic activities and aggregate 5uM 5% HiLyte-555 labeled A $\beta$ 42 monomers (red) into A $\beta$  plaque-like structures.

**Supplementary Movie 2 | Human CD14-derived macrophages continuously internalize A $\beta$  and do not form extracellular plaques.** Live cell imaging movie (30 minutes/second) using 10X objective and Incucyte Zoom software over a 7-day timelapse shows human CD14-derived macrophages (phase) show low motility when treated with 5uM 5% HiLyte-555 labeled A $\beta$ 42 monomers (red) and continuously internalize A $\beta$

**Supplementary Movie 3 | Human iPSC microglia exhibit dynamic activities during A $\beta$  plaque formation.** Live cell imaging movie (30 minutes/second) using 10X objective and Incucyte Zoom software over a 7-day timelapse with human iPSC microglia (phase) treated with 5uM soluble A $\beta$  species labeled by HiLyte555 and pHrodo Green. Microglia (phase) continuously internalize A $\beta$  (green) before plaque formation (red) in the center of a group of cultured microglia.
